# Supplementary material
Source: publisher figshare collection journal article supplement (https://frontiersin.figshare.com/ndownloader/files/23547128)
Supplement: Supplementary file 1 [file 23547128]

**Table S1:** Summary of the environmental covariates tested in this study. Each row in the table reports a summary of the 19 weekly values for the population. **Population:** indicates the breeding company and breed, in which **SPG:** Smithfield Premium Genetics, **TML:** The Maschhoffs, **LR:** Landrace, **LW:** Large White, and **YS:** Yorkshire (also known as Large White in other breeding companies). **Average Mean:** the mean of the environmental covariate was averaged. **Average SD:** the standard deviation of the environmental covariate was averaged. **Autocorrelation:** correlation between the environmental covariate values at week  $t$  and week  $t+1$ .

| Population | Variable            | Average Mean | Average SD | Autocorrelation |
|------------|---------------------|--------------|------------|-----------------|
| SPG_LR     | Average Temperature | 16.10        | 8.84       | 0.92            |
| SPG_LR     | Maximum temperature | 22.79        | 8.94       | 0.89            |
| SPG_LR     | Minimum Temperature | 9.14         | 8.91       | 0.93            |
| SPG_LR     | Relative Humidity   | 53.58        | 14.39      | 0.75            |
| SPG_LR     | THI                 | 60.23        | 11.92      | 0.92            |
| SPG_LW     | Average Temperature | 16.05        | 8.90       | 0.92            |
| SPG_LW     | Maximum temperature | 22.79        | 8.95       | 0.90            |
| SPG_LW     | Minimum Temperature | 9.03         | 9.03       | 0.93            |
| SPG_LW     | Relative Humidity   | 51.44        | 14.40      | 0.73            |
| SPG_LW     | THI                 | 60.07        | 11.87      | 0.91            |
| TML_LR     | Average Temperature | 12.80        | 9.73       | 0.92            |
| TML_LR     | Maximum temperature | 18.80        | 10.17      | 0.90            |
| TML_LR     | Minimum Temperature | 6.53         | 9.52       | 0.92            |
| TML_LR     | Relative Humidity   | 67.17        | 9.60       | 0.66            |
| TML_LR     | THI                 | 55.64        | 14.53      | 0.92            |
| TML_YS     | Average Temperature | 12.01        | 9.75       | 0.92            |
| TML_YS     | Maximum temperature | 17.95        | 10.24      | 0.90            |
| TML_YS     | Minimum Temperature | 5.79         | 9.50       | 0.92            |
| TML_YS     | Relative Humidity   | 67.41        | 9.52       | 0.66            |
| TML_YS     | THI                 | 54.44        | 14.63      | 0.92            |
