# Supplementary material
Source: publisher figshare collection journal article supplement (https://frontiersin.figshare.com/ndownloader/files/23547128)
Supplement: Supplementary file 3 [file 23547128]

**Table S3b:** Significant windows for slope term on number of piglets born alive (NBA) as regressed on average THI 86 to 93 days into pregnancy in the Landrace population of the Maschhoffs breeding company (TML LR).

| Location                            | Var(%)<br>and N<br>SNPs in<br>brackets | Positional genes                                                                                                                                                                                                                                                                                                                                                                                                                                                                                                         | QTL traits                                                                                          |
|-------------------------------------|----------------------------------------|--------------------------------------------------------------------------------------------------------------------------------------------------------------------------------------------------------------------------------------------------------------------------------------------------------------------------------------------------------------------------------------------------------------------------------------------------------------------------------------------------------------------------|-----------------------------------------------------------------------------------------------------|
| SSC12:<br>15,953,277-<br>17,487,606 | 0.45(32)                               | <i>ENSSSCG00000017299 (MARCH10), ENSSSCG00000017300 (MRC2), ENSSSCG00000017301 (TLK2), ENSSSCG00000033421, ENSSSCG00000017304 (EFCAB3), ENSSSCG00000051573, ENSSSCG00000045518, ENSSSCG00000047329, ENSSSCG00000049121, ENSSSCG00000017305, ENSSSCG00000017306, ENSSSCG00000017307 (MYL4), ENSSSCG00000017308 (CDC27), ENSSSCG00000017310 (KANSL1), ENSSSCG00000017311 (MAPT), ENSSSCG00000043989, ENSSSCG00000017314 (SPPL2C), ENSSSCG00000017313, ENSSSCG00000031893, ENSSSCG00000017316 (NSF), ENSSSCG00000031561</i> | Red blood cell count, hematocrit, loin muscle area, loin pH 24 hours <i>post-mortem</i>             |
| SSC9:<br>28,988,041-<br>29,535,913  | 0.39(10)                               | <i>ENSSSCG00000039906, ENSSSCG00000020347, ENSSSCG00000048478</i>                                                                                                                                                                                                                                                                                                                                                                                                                                                        | Litter weight, hind leg conformation                                                                |
| SSC5:<br>5,425,963-<br>5,866,100    | 0.34(21)                               | <i>ENSSSCG00000038685 (MPPED1), ENSSSCG00000051106, ENSSSCG00000000029 (SCUBE1), ENSSSCG00000000034 (TTLL12), ENSSSCG00000000033, ENSSSCG00000000031 (MCAT), ENSSSCG00000042788, ENSSSCG00000046130, ENSSSCG00000000035 (TTLL1), ENSSSCG00000048701, ENSSSCG00000000036 (PACSIN2)</i>                                                                                                                                                                                                                                    | Hind feet conformation, corpus luteum number                                                        |
| SSC6:<br>23,525,525-<br>23,900,710  | 0.34(16)                               | <i>ENSSSCG00000047100, ENSSSCG00000018823, ENSSSCG00000048963, ENSSSCG00000050597, ENSSSCG00000047287</i>                                                                                                                                                                                                                                                                                                                                                                                                                | Obesity index, gestation length, Eicosadienoic acid content, body weight (60 days)                  |
| SSC1:<br>67,946,336-<br>69,552,297  | 0.30(14)                               | <i>ENSSSCG00000004361 (GRIK2)</i>                                                                                                                                                                                                                                                                                                                                                                                                                                                                                        | Obesity index, backfat between 3 <sup>rd</sup> and 4 <sup>th</sup> last ribs                        |
| SSC2:<br>12,620,747-<br>12,983,721  | 0.26(16)                               | <i>ENSSSCG00000046156, ENSSSCG00000034228, ENSSSCG00000050477, ENSSSCG00000039851, ENSSSCG00000031496, ENSSSCG00000048530 (OR5B3), ENSSSCG00000041440, ENSSSCG00000039026, ENSSSCG00000041067, ENSSSCG00000040949, ENSSSCG00000041818, ENSSSCG00000013162,</i>                                                                                                                                                                                                                                                           | Obesity index, loin pH 24 hours <i>post-mortem</i> , water holding capacity, drip loss, loin muscle |

|                                                                                                                                                                           |          |                                                                                                                                                                                                                                                                                                                                                                  |                                                                                                                       |
|---------------------------------------------------------------------------------------------------------------------------------------------------------------------------|----------|------------------------------------------------------------------------------------------------------------------------------------------------------------------------------------------------------------------------------------------------------------------------------------------------------------------------------------------------------------------|-----------------------------------------------------------------------------------------------------------------------|
| <i>ENSSSCG00000037988, ENSSSCG00000040200, ENSSSCG00000037952, ENSSSCG00000046773, ENSSSCG00000044981 (OR9Q2), ENSSSCG00000041862 (OR9Q1), ENSSSCG00000035278 (OR9I1)</i> |          |                                                                                                                                                                                                                                                                                                                                                                  | depth, loin muscle area, pH 45 minutes <i>post-mortem</i>                                                             |
| SSC1:<br>302,821,402-<br>303,265,377                                                                                                                                      | 0.25(13) | .                                                                                                                                                                                                                                                                                                                                                                | Feed conversion ratio, front feet conformation                                                                        |
| SSC6:<br>131,951,039-<br>132,437,869                                                                                                                                      | 0.23(12) | <i>ENSSSCG00000003761 (ADGRL2)</i>                                                                                                                                                                                                                                                                                                                               | .                                                                                                                     |
| SSC9:<br>29,872,932-<br>30,447,236                                                                                                                                        | 0.22(10) | <i>ENSSSCG000000043295</i>                                                                                                                                                                                                                                                                                                                                       | .                                                                                                                     |
| SSC3:<br>73,996,122-<br>74,404,095                                                                                                                                        | 0.22(10) | <i>ENSSSCG00000008348 (PLEK), ENSSSCG00000036115, ENSSSCG00000008352 (PNO1), ENSSSCG00000008353 (WDR92), ENSSSCG00000039331, ENSSSCG00000019420, ENSSSCG00000047894, ENSSSCG00000047644</i>                                                                                                                                                                      | <i>Salmonella</i> shedding status, CD8-positive leukocyte percentage, CD8-negative leukocyte percentage, CD3-negative |
| SSC5:<br>109,793,126-<br>110,108,812                                                                                                                                      | 0.21(10) | .                                                                                                                                                                                                                                                                                                                                                                | .                                                                                                                     |
| SSC8:<br>72,814,981-<br>73,286,056                                                                                                                                        | 0.21(21) | <i>ENSSSCG000000046008, ENSSSCG00000036445, ENSSSCG00000049617, ENSSSCG00000008989 (CNOT6L)</i>                                                                                                                                                                                                                                                                  | Front leg conformation, mean corpuscular volume                                                                       |
| SSC8:<br>116,174,773-<br>116,913,617                                                                                                                                      | 0.20(11) | <i>ENSSSCG000000021764 (ARHGEF38), ENSSSCG000000022788 (PPA2), ENSSSCG00000009157 (TET2), ENSSSCG000000044596</i>                                                                                                                                                                                                                                                | .                                                                                                                     |
| SSC6:<br>14,710,455-<br>15,125,392                                                                                                                                        | 0.20(14) | <i>ENSSSCG00000002739 (PHLPP2), ENSSSCG00000002740 (AP1G1), ENSSSCG00000019395 (SNORD71), ENSSSCG00000035474, ENSSSCG000000038917 (ATXNIL), ENSSSCG00000002743 (IST1), ENSSSCG00000002741 (ZNF821), ENSSSCG00000002746 (DHODH), ENSSSCG00000002749, ENSSSCG00000050689, ENSSSCG00000025218 (TXNL4B), ENSSSCG00000002748 (DHX38), ENSSSCG00000002747 (PMFBP1)</i> | Unsaturated fatty acid content                                                                                        |

|                                   |          |                                                                                                                                                                                                                                                                                                                                                                                                                                                           |                              |
|-----------------------------------|----------|-----------------------------------------------------------------------------------------------------------------------------------------------------------------------------------------------------------------------------------------------------------------------------------------------------------------------------------------------------------------------------------------------------------------------------------------------------------|------------------------------|
| SSC17:<br>3,329,329-<br>3,907,409 | 0.19(11) | <i>ENSSSCG00000021988 (TUSC3), ENSSSCG00000041353, ENSSSCG00000038686,<br/>ENSSSCG00000006979 (MSR1), ENSSSCG00000044505</i>                                                                                                                                                                                                                                                                                                                              | .                            |
| SSC5:<br>6,513,590-<br>6,784,210  | 0.19(10) | <i>ENSSSCG00000032171 (TCF20), ENSSSCG00000000046, ENSSSCG00000035064,<br/>ENSSSCG00000045281, ENSSSCG00000043669, ENSSSCG00000000045<br/>(NDUFA6), ENSSSCG00000020945 (SMDT1), ENSSSCG00000000050,<br/>ENSSSCG00000038492 (PHETA2), ENSSSCG00000000040 (SEPTIN3),<br/>ENSSSCG00000038658, ENSSSCG00000035991 (CENPM), ENSSSCG00000039074<br/>(TNFRSF13C), ENSSSCG00000035755 (SHISA8), ENSSSCG00000026092<br/>(SREBF2), ENSSSCG00000035565 (CCDC134)</i> | Intramuscular fat<br>content |
