# Supplementary material
Source: publisher figshare collection journal article supplement (https://frontiersin.figshare.com/ndownloader/files/23547128)
Supplement: Supplementary file 5 [file 23547128]

**Table S3a:** Significant windows for intercept term on number of piglets born alive (NBA) as regressed on average THI 86 to 93 days into pregnancy in the Landrace population of the Maschhoffs breeding company (TML\_LR).

| Location                            | Var(%)<br>and N<br>SNPs in<br>brackets | Positional genes                                                                                                                                                                                                                                                                                                                                                                                                                                                                                                                                                                                                                                                                                                                                                                                                                                                                                                                                                                                                                                                             | QTL traits                                                                                                                              |
|-------------------------------------|----------------------------------------|------------------------------------------------------------------------------------------------------------------------------------------------------------------------------------------------------------------------------------------------------------------------------------------------------------------------------------------------------------------------------------------------------------------------------------------------------------------------------------------------------------------------------------------------------------------------------------------------------------------------------------------------------------------------------------------------------------------------------------------------------------------------------------------------------------------------------------------------------------------------------------------------------------------------------------------------------------------------------------------------------------------------------------------------------------------------------|-----------------------------------------------------------------------------------------------------------------------------------------|
| SSC1:<br>67,951,385-<br>71,151,381  | 0.47(37)                               | <i>ENSSSCG00000004361 (GRIK2), ENSSSCG000000046266,<br/>ENSSSCG000000047827, ENSSSCG000000041890,<br/>ENSSSCG00000004364 (HACE1)</i>                                                                                                                                                                                                                                                                                                                                                                                                                                                                                                                                                                                                                                                                                                                                                                                                                                                                                                                                         | Obesity index, backfat<br>between 3 <sup>rd</sup> and 4 <sup>th</sup> last ribs,<br>CD4-positive                                        |
| SSC11:<br>79,931,895-<br>80,427,841 | 0.34(17)                               | .                                                                                                                                                                                                                                                                                                                                                                                                                                                                                                                                                                                                                                                                                                                                                                                                                                                                                                                                                                                                                                                                            | Hind leg conformation,<br>platelet count                                                                                                |
| SSC1:<br>266,158-<br>2,322,507      | 0.34(38)                               | <i>ENSSSCG000000043002, ENSSSCG000000050193,<br/>ENSSSCG000000046031, ENSSSCG000000042397,<br/>ENSSSCG000000035944, ENSSSCG000000047845,<br/>ENSSSCG00000004010 (ERMARD), ENSSSCG00000004009 (TCTE3),<br/>ENSSSCG000000030155 (PHF10), ENSSSCG000000038931 (C6orf120),<br/>ENSSSCG00000004008, ENSSSCG000000045488,<br/>ENSSSCG000000048735, ENSSSCG000000049501,<br/>ENSSSCG00000004012 (THBS2), ENSSSCG000000035661,<br/>ENSSSCG000000032192, ENSSSCG000000044353,<br/>ENSSSCG000000041157, ENSSSCG000000050693,<br/>ENSSSCG000000042085, ENSSSCG000000045916,<br/>ENSSSCG00000004013 (SMOC2), ENSSSCG000000043714,<br/>ENSSSCG000000031703 (DACT2), ENSSSCG000000044594,<br/>ENSSSCG000000048580, ENSSSCG00000004017,<br/>ENSSSCG000000049642, ENSSSCG00000004016,<br/>ENSSSCG00000004018 (AFDN), ENSSSCG000000038097,<br/>ENSSSCG000000047676, ENSSSCG000000047753,<br/>ENSSSCG000000051018, ENSSSCG000000049134,<br/>ENSSSCG000000045280, ENSSSCG000000043317,<br/>ENSSSCG000000051690, ENSSSCG000000027404 (UNC93A),<br/>ENSSSCG000000051474, ENSSSCG000000022580,</i> | Arachidonic acid to dihomogamma-linolenic acid ratio,<br>Arachidonic acid to<br>eicosadienoic acid ratio,<br>backfat at rump, drip loss |

|                                    |          |                                                                                                                                                                                                                                                                                                                                                                                                                                                                                                                                                                                                                                                                     |                                           |
|------------------------------------|----------|---------------------------------------------------------------------------------------------------------------------------------------------------------------------------------------------------------------------------------------------------------------------------------------------------------------------------------------------------------------------------------------------------------------------------------------------------------------------------------------------------------------------------------------------------------------------------------------------------------------------------------------------------------------------|-------------------------------------------|
|                                    |          | <i>ENSSSCG00000032403, ENSSSCG00000037137,<br/> ENSSSCG00000024562 (CCR6), ENSSSCG00000034196,<br/> ENSSSCG00000004023 (FGFR1OP), ENSSSCG00000043814,<br/> ENSSSCG00000004024, ENSSSCG00000048164,<br/> ENSSSCG00000043922, ENSSSCG0000004022 (RPS6KA2)</i>                                                                                                                                                                                                                                                                                                                                                                                                         |                                           |
| SSC9:<br>43,064,592-<br>43,794,001 | 0.34(17) | <i>ENSSSCG00000051653, ENSSSCG00000049753,<br/> ENSSSCG00000041196</i>                                                                                                                                                                                                                                                                                                                                                                                                                                                                                                                                                                                              | .                                         |
| SSC2:<br>19,873,884-<br>20,805,003 | 0.33(16) | <i>ENSSSCG00000047796, ENSSSCG00000047142,<br/> ENSSSCG00000045282, ENSSSCG00000042424</i>                                                                                                                                                                                                                                                                                                                                                                                                                                                                                                                                                                          | Body depth, rib shape,<br>coping behavior |
| SSC8:<br>871,763-<br>1,716,574     | 0.33(20) | <i>ENSSSCG00000030827 (FGFR3), ENSSSCG00000008675 (LETM1),<br/> ENSSSCG00000051354, ENSSSCG00000049380,<br/> ENSSSCG00000008682 (NSD2), ENSSSCG00000020173 (SCARNA22),<br/> ENSSSCG00000008681 (NELFA), ENSSSCG00000008686,<br/> ENSSSCG00000033541 (NAT8L), ENSSSCG00000008684 (POLN),<br/> ENSSSCG00000027718 (HAUS3), ENSSSCG00000008687 (MXD4),<br/> ENSSSCG00000008689 (ZFYE28), ENSSSCG00000034633<br/> (CFAP99), ENSSSCG00000008690 (RNF4), ENSSSCG00000029745<br/> (FAM193A), ENSSSCG00000008691 (TNIP2), ENSSSCG00000022004<br/> (SH3BP2), ENSSSCG00000044393, ENSSSCG00000008692 (ADD1),<br/> ENSSSCG00000008695 (MFSD10), ENSSSCG00000008693 (NOP14)</i> | Days to 115 kg                            |
| SSC1:<br>71,950,726-<br>73,330,274 | 0.32(22) | <i>ENSSSCG00000042384, ENSSSCG00000045922,<br/> ENSSSCG00000034393, ENSSSCG00000049688,<br/> ENSSSCG00000043520, ENSSSCG0000004370 (ATG5),<br/> ENSSSCG0000004369 (PRDM1), ENSSSCG0000004371 (CRYBG1),<br/> ENSSSCG00000035339, ENSSSCG00000046528,<br/> ENSSSCG00000041504, ENSSSCG0000004373 (RTN4IP1),<br/> ENSSSCG0000004374 (QRSL1), ENSSSCG00000049906,<br/> ENSSSCG00000043597, ENSSSCG00000031023,<br/> ENSSSCG00000037071, ENSSSCG00000037985 (MTRES1),<br/> ENSSSCG00000031159, ENSSSCG00000036168 (PDSS2)</i>                                                                                                                                            | CD4-positive, time spent<br>lying         |

|                                |          |                                                                                                                                                                                                                                                                                                                                                                                                                                                                                                                                                                                                                                                                                                                                                                                                                                                                                                                                                                                                                                                                                                                                                                                                                                           |                                                           |
|--------------------------------|----------|-------------------------------------------------------------------------------------------------------------------------------------------------------------------------------------------------------------------------------------------------------------------------------------------------------------------------------------------------------------------------------------------------------------------------------------------------------------------------------------------------------------------------------------------------------------------------------------------------------------------------------------------------------------------------------------------------------------------------------------------------------------------------------------------------------------------------------------------------------------------------------------------------------------------------------------------------------------------------------------------------------------------------------------------------------------------------------------------------------------------------------------------------------------------------------------------------------------------------------------------|-----------------------------------------------------------|
| SSC8: 4,941-465,122            | 0.32(13) | <i>ENSSSCG00000047999, ENSSSCG00000039991 (PIGG),</i><br><i>ENSSSCG00000043358 (TMEM271), ENSSSCG00000036645</i><br><i>(PDE6B), ENSSSCG00000023903, ENSSSCG00000027502 (MYL5),</i><br><i>ENSSSCG00000026084 (SLC49A3), ENSSSCG00000019544,</i><br><i>ENSSSCG00000029983 (PCGF3), ENSSSCG00000037527 (CPLX1),</i><br><i>ENSSSCG00000046122, ENSSSCG00000021289 (GAK),</i><br><i>ENSSSCG00000038234 (TMEM175), ENSSSCG00000027286 (DGKQ),</i><br><i>ENSSSCG00000032262 (IDUA), ENSSSCG00000035739 (SLC26A1),</i><br><i>ENSSSCG00000036512 (FGFRL1), ENSSSCG00000045703,</i><br><i>ENSSSCG00000032808, ENSSSCG00000039488 (SPON2)</i>                                                                                                                                                                                                                                                                                                                                                                                                                                                                                                                                                                                                        |                                                           |
| SSC2:<br>7,190,662-7,921,973   | 0.32(16) | <i>ENSSSCG00000023178 (BATF2), ENSSSCG00000040674,</i><br><i>ENSSSCG00000013015 (GPHA2), ENSSSCG00000013016 (PPP2R5B),</i><br><i>ENSSSCG00000023890 (ATG2A), ENSSSCG00000045555,</i><br><i>ENSSSCG00000019906, ENSSSCG00000046741,</i><br><i>ENSSSCG00000018349, ENSSSCG00000013017 (EHD1),</i><br><i>ENSSSCG00000013018 (CDC42BPG), ENSSSCG00000013019</i><br><i>(MEN1), ENSSSCG00000013020 (MAP4K2), ENSSSCG00000013022</i><br><i>(PYGM), ENSSSCG00000013023, ENSSSCG00000033229 (NRXN2),</i><br><i>ENSSSCG00000051519, ENSSSCG00000013024,</i><br><i>ENSSSCG00000013025 (SLC22A12), ENSSSCG00000020831</i><br><i>(SLC22A11), ENSSSCG00000043801, ENSSSCG00000050721,</i><br><i>ENSSSCG00000044804, ENSSSCG00000028806 (RPS6KA4),</i><br><i>ENSSSCG00000013042, ENSSSCG00000013030,</i><br><i>ENSSSCG00000013029 (TRMT112), ENSSSCG00000013028 (ESRRA),</i><br><i>ENSSSCG00000013027, ENSSSCG00000013031 (KCNK4),</i><br><i>ENSSSCG00000013032 (GPR137), ENSSSCG00000013033 (BAD),</i><br><i>ENSSSCG00000013034 (PLCB3), ENSSSCG00000037999,</i><br><i>ENSSSCG00000033757, ENSSSCG00000013038,</i><br><i>ENSSSCG00000013039 (NUDT22), ENSSSCG00000013040 (TRPT1),</i><br><i>ENSSSCG00000013041 (FERMT3), ENSSSCG00000021620 (STIP1)</i> | Average daily gain, loin and neck weight, backfat at rump |
| SSC1:<br>65,183,502-66,336,428 | 0.31(21) | <i>ENSSSCG00000042619, ENSSSCG00000051730,</i><br><i>ENSSSCG00000047707, ENSSSCG00000044402,</i><br><i>ENSSSCG00000047909, ENSSSCG00000049009,</i>                                                                                                                                                                                                                                                                                                                                                                                                                                                                                                                                                                                                                                                                                                                                                                                                                                                                                                                                                                                                                                                                                        | Conductivity 45 minutes post-mortem, mummified            |

|                             |          |                                                                                                                                                                                                                                                                                                                                                                                                                                                                                                                                                                                                                                                                                                                                                                                                               |                                                                                                      |
|-----------------------------|----------|---------------------------------------------------------------------------------------------------------------------------------------------------------------------------------------------------------------------------------------------------------------------------------------------------------------------------------------------------------------------------------------------------------------------------------------------------------------------------------------------------------------------------------------------------------------------------------------------------------------------------------------------------------------------------------------------------------------------------------------------------------------------------------------------------------------|------------------------------------------------------------------------------------------------------|
|                             |          | <p><i>ENSSSCG00000018969, ENSSSCG00000044799,</i><br/> <i>ENSSSCG00000046887, ENSSSCG00000047992,</i><br/> <i>ENSSSCG00000043225, ENSSSCG00000041445,</i><br/> <i>ENSSSCG00000049318, ENSSSCG0000004347 (FBXL4),</i><br/> <i>ENSSSCG0000004349 (FAXC), ENSSSCG00000037594 (PNISR)</i></p>                                                                                                                                                                                                                                                                                                                                                                                                                                                                                                                     | pigs, maternal infanticide,<br>Hemoglobin                                                            |
| SSC3:                       |          |                                                                                                                                                                                                                                                                                                                                                                                                                                                                                                                                                                                                                                                                                                                                                                                                               |                                                                                                      |
| 141,963,034-<br>142,766,769 | 0.29(16) | .                                                                                                                                                                                                                                                                                                                                                                                                                                                                                                                                                                                                                                                                                                                                                                                                             | .                                                                                                    |
| SSC8:                       |          |                                                                                                                                                                                                                                                                                                                                                                                                                                                                                                                                                                                                                                                                                                                                                                                                               | Body weight (birth), front<br>leg conformation, front feet<br>conformation                           |
| 140,234,308-<br>140,885,162 | 0.29(22) | .                                                                                                                                                                                                                                                                                                                                                                                                                                                                                                                                                                                                                                                                                                                                                                                                             |                                                                                                      |
| SSC13:                      |          | <p><i>ENSSSCG00000011398 (SEMA3F), ENSSSCG00000042718 (GNAT1),</i><br/> <i>ENSSSCG00000011397 (SLC38A3), ENSSSCG00000011399 (GNAI2),</i><br/> <i>ENSSSCG00000011400 (SEMA3B), ENSSSCG00000011401</i><br/> <i>(LSMEM2), ENSSSCG00000011402 (IFRD2), ENSSSCG00000041673,</i><br/> <i>ENSSSCG00000024363 (HYAL3), ENSSSCG00000011404,</i><br/> <i>ENSSSCG00000011405 (HYAL2), ENSSSCG00000011407 (RASSF1),</i><br/> <i>ENSSSCG00000011408 (ZMYND10), ENSSSCG00000011410</i><br/> <i>(CYB561D2), ENSSSCG00000043195 (TMEM115),</i><br/> <i>ENSSSCG00000011412 (CACNA2D2), ENSSSCG00000037433</i><br/> <i>(C3orf18), ENSSSCG00000025272 (HEMK1), ENSSSCG00000048288,</i><br/> <i>ENSSSCG00000050226, ENSSSCG00000040581,</i><br/> <i>ENSSSCG00000011415 (MAPKAPK3), ENSSSCG00000011416</i><br/> <i>(DOCK3)</i></p> | Firmness, hip structure, front<br>leg conformation, hind leg<br>conformation                         |
| 32,626,695-<br>33,219,455   | 0.28(19) |                                                                                                                                                                                                                                                                                                                                                                                                                                                                                                                                                                                                                                                                                                                                                                                                               |                                                                                                      |
| SSC1:                       |          | <p><i>ENSSSCG00000005106 (NTRK3), ENSSSCG00000044241,</i><br/> <i>ENSSSCG00000050818, ENSSSCG00000041527,</i><br/> <i>ENSSSCG00000043508, ENSSSCG00000045893,</i><br/> <i>ENSSSCG00000036551, ENSSSCG00000051349,</i><br/> <i>ENSSSCG00000048252, ENSSSCG00000045398,</i><br/> <i>ENSSSCG00000042933, ENSSSCG00000044158,</i><br/> <i>ENSSSCG00000005109 (ESR2)</i></p>                                                                                                                                                                                                                                                                                                                                                                                                                                       | Feed conversion ratio,<br>residual feed intake,<br>intramuscular fat content,<br>number of stillborn |
| 191,857,174-<br>193,873,995 | 0.28(17) |                                                                                                                                                                                                                                                                                                                                                                                                                                                                                                                                                                                                                                                                                                                                                                                                               |                                                                                                      |

|                                      |          |                                                                                                                                                                                                                                                                                                                                                                                                                                                                                                                                                                                                                                                                                                                                                                                                 |                                                                                                                                                                                                    |
|--------------------------------------|----------|-------------------------------------------------------------------------------------------------------------------------------------------------------------------------------------------------------------------------------------------------------------------------------------------------------------------------------------------------------------------------------------------------------------------------------------------------------------------------------------------------------------------------------------------------------------------------------------------------------------------------------------------------------------------------------------------------------------------------------------------------------------------------------------------------|----------------------------------------------------------------------------------------------------------------------------------------------------------------------------------------------------|
| SSC1:<br>185,048,329-<br>185,734,190 | 0.28(17) | <i>ENSSSCG00000005060 (KTN1), ENSSSCG000000033800 (PELI2),<br/>ENSSSCG000000050996</i>                                                                                                                                                                                                                                                                                                                                                                                                                                                                                                                                                                                                                                                                                                          | Obesity index                                                                                                                                                                                      |
| SSC16:<br>37,733,559-<br>39,019,226  | 0.28(18) | <i>ENSSSCG000000043299, ENSSSCG000000016929 (PDE4D),<br/>ENSSSCG000000046737, ENSSSCG000000018875</i>                                                                                                                                                                                                                                                                                                                                                                                                                                                                                                                                                                                                                                                                                           | Days to 100 kg, feed<br>conversion ratio, Arachidic<br>acid to stearic acid ratio, loin<br>muscle area, Arachidic acid<br>content, Eicosenoic acid to<br>eicosanoic acid ratio, coping<br>behavior |
| SSC1:<br>182,684,682-<br>183,880,998 | 0.27(17) | <i>ENSSSCG000000005043 (DDHD1), ENSSSCG000000051102,<br/>ENSSSCG000000041305, ENSSSCG000000005045 (BMP4),<br/>ENSSSCG000000005047 (CDKN3), ENSSSCG000000027256 (CNIH1),<br/>ENSSSCG000000026294 (GMFB), ENSSSCG000000021451 (CGRRF1)</i>                                                                                                                                                                                                                                                                                                                                                                                                                                                                                                                                                        | Obesity index                                                                                                                                                                                      |
| SSC6:<br>71,960,401-<br>72,949,935   | 0.27(24) | <i>ENSSSCG000000028965, ENSSSCG000000003432 (KIAA2013),<br/>ENSSSCG000000003433 (PLOD1), ENSSSCG000000003434 (MFN2),<br/>ENSSSCG000000003435 (MIIP), ENSSSCG000000022208 (TNFRSF1B),<br/>ENSSSCG000000003438 (VPS13D), ENSSSCG000000020322,<br/>ENSSSCG000000041182 (SNORA59A), ENSSSCG000000048520,<br/>ENSSSCG000000003439 (DHRS3), ENSSSCG000000049829,<br/>ENSSSCG000000003440 (AADACL4), ENSSSCG000000003441<br/>(AADACL3), ENSSSCG000000045525, ENSSSCG000000003442<br/>(Clorf158), ENSSSCG000000003444, ENSSSCG0000000033480,<br/>ENSSSCG0000000033129, ENSSSCG0000000033821,<br/>ENSSSCG0000000037747, ENSSSCG0000000031836,<br/>ENSSSCG0000000044717, ENSSSCG0000000032991,<br/>ENSSSCG0000000039417, ENSSSCG0000000040680,<br/>ENSSSCG0000000037632, ENSSSCG000000003449 (LRRC38)</i> | Age at puberty, CD3-<br>negative, Stearic acid<br>content, litter size, drip loss,<br>impedance 24 hours post-<br>mortem, pH 45 minutes<br><i>post-mortem</i>                                      |
| SSC5:<br>71,774,499-<br>72,424,166   | 0.25(14) | <i>ENSSSCG000000045210, ENSSSCG000000044708,<br/>ENSSSCG000000000784, ENSSSCG000000047044,<br/>ENSSSCG000000041614, ENSSSCG000000000789 (CNTN1)</i>                                                                                                                                                                                                                                                                                                                                                                                                                                                                                                                                                                                                                                             | Dressing percentage                                                                                                                                                                                |

|                                      |          |                                                                                                                                                                                                                                                                                                                                                                                                                                                                                                                                                                                                                                                                                                                                                                                                                                                                                                                                                                                                                                                                                                                                                                                                                                                                                                                                   |                                                                                                                                                                                    |
|--------------------------------------|----------|-----------------------------------------------------------------------------------------------------------------------------------------------------------------------------------------------------------------------------------------------------------------------------------------------------------------------------------------------------------------------------------------------------------------------------------------------------------------------------------------------------------------------------------------------------------------------------------------------------------------------------------------------------------------------------------------------------------------------------------------------------------------------------------------------------------------------------------------------------------------------------------------------------------------------------------------------------------------------------------------------------------------------------------------------------------------------------------------------------------------------------------------------------------------------------------------------------------------------------------------------------------------------------------------------------------------------------------|------------------------------------------------------------------------------------------------------------------------------------------------------------------------------------|
| SSC6:<br>119,172,911-<br>121,684,388 | 0.23(38) | <p><i>ENSSSCG00000030018 (ZNF396), ENSSSCG00000038859 (INO80C),</i><br/> <i>ENSSSCG00000003743 (GALNT1), ENSSSCG00000030002</i><br/> <i>(C18orf21), ENSSSCG000000027700 (RPRD1A),</i><br/> <i>ENSSSCG00000035019, ENSSSCG00000027455 (SLC39A6),</i><br/> <i>ENSSSCG00000020898 (ELP2), ENSSSCG00000003744 (MOCOS),</i><br/> <i>ENSSSCG00000027935 (FHOD3), ENSSSCG00000043137,</i><br/> <i>ENSSSCG00000003746, ENSSSCG00000026953 (TPGS2),</i><br/> <i>ENSSSCG00000042283, ENSSSCG00000034886,</i><br/> <i>ENSSSCG00000003747 (KIAA1328), ENSSSCG00000047288,</i><br/> <i>ENSSSCG00000045019, ENSSSCG00000003748 (CELF4),</i><br/> <i>ENSSSCG00000042833, ENSSSCG00000045034</i></p>                                                                                                                                                                                                                                                                                                                                                                                                                                                                                                                                                                                                                                              | Intramuscular fat content,<br>litter size, backfat at 10 <sup>th</sup> rib,<br>pH 45 minutes <i>post-mortem</i> ,<br>cervical vertebra length,<br>Docosapentaenoic acid<br>content |
| SSC12:<br>879,362-<br>1,516,612      | 0.23(15) | <p><i>ENSSSCG00000029553, ENSSSCG00000029944,</i><br/> <i>ENSSSCG00000040352 (DUS1L), ENSSSCG00000033689 (GPS1),</i><br/> <i>ENSSSCG00000040385 (RFNG), ENSSSCG00000031851,</i><br/> <i>ENSSSCG00000039873 (DCXR), ENSSSCG00000036973 (RAC3),</i><br/> <i>ENSSSCG00000040503 (LRRC45), ENSSSCG00000049515,</i><br/> <i>ENSSSCG00000040727 (ASPSCR1), ENSSSCG00000039013</i><br/> <i>(NOTUM), ENSSSCG00000044793, ENSSSCG00000032974</i><br/> <i>(MYADML2), ENSSSCG00000034723 (PYCR1),</i><br/> <i>ENSSSCG00000033148 (MRPL12), ENSSSCG00000035253 (MAFG),</i><br/> <i>ENSSSCG00000034695 (SIRT7), ENSSSCG00000039650 (PCYT2),</i><br/> <i>ENSSSCG00000032655 (ALYREF), ENSSSCG00000035837,</i><br/> <i>ENSSSCG00000035728, ENSSSCG00000034058 (ARHGDI1),</i><br/> <i>ENSSSCG00000039148 (P4HB), ENSSSCG00000037039 (PPP1R27),</i><br/> <i>ENSSSCG00000039424 (MCRIP1), ENSSSCG00000034891,</i><br/> <i>ENSSSCG00000028355 (ACTG1), ENSSSCG00000033620,</i><br/> <i>ENSSSCG00000033082 (HGS), ENSSSCG00000034716 (CCDC137),</i><br/> <i>ENSSSCG00000033788 (OXMLD1), ENSSSCG00000045526,</i><br/> <i>ENSSSCG00000031531 (TSPAN10), ENSSSCG00000024235</i><br/> <i>(NPLOC4), ENSSSCG00000029616 (FAAP100),</i><br/> <i>ENSSSCG00000026155 (FSCN2), ENSSSCG00000051223,</i><br/> <i>ENSSSCG00000023045, ENSSSCG00000048652,</i></p> | Palmitic acid to myristic<br>acid ratio, Myristic acid<br>content, Oleic acid to<br>palmitoleic acid ratio                                                                         |

*ENSSSCG00000022317 (SLC38A10), ENSSSCG00000039183 (NDUFAF8)*

|                                      |          |                                                                                                                                                                                                                                                                                                                           |                                                                                                                                                                                                                                                                                          |
|--------------------------------------|----------|---------------------------------------------------------------------------------------------------------------------------------------------------------------------------------------------------------------------------------------------------------------------------------------------------------------------------|------------------------------------------------------------------------------------------------------------------------------------------------------------------------------------------------------------------------------------------------------------------------------------------|
| SSC3:<br>11,346,527-<br>11,643,257   | 0.22(13) | <i>ENSSSCG00000025966, ENSSSCG00000027487 (LAT2),<br/>ENSSSCG00000028504 (RFC2), ENSSSCG00000007719 (CLIP2),<br/>ENSSSCG00000007720 (GTF2IRD1)</i>                                                                                                                                                                        | .                                                                                                                                                                                                                                                                                        |
| SSC18:<br>52,862,142-<br>53,233,305  | 0.22(12) | <i>ENSSSCG00000050225, ENSSSCG00000044824,<br/>ENSSSCG00000035077, ENSSSCG00000034662,<br/>ENSSSCG00000045227</i>                                                                                                                                                                                                         | .                                                                                                                                                                                                                                                                                        |
| SSC6:<br>75,839,337-<br>76,941,199   | 0.22(22) | <i>ENSSSCG00000003481 (PAD11), ENSSSCG00000003482 (PAD13),<br/>ENSSSCG00000003483 (PAD14), ENSSSCG00000003484 (PAD16),<br/>ENSSSCG00000003485 (RCC2), ENSSSCG00000003486<br/>(ARHGEF10L), ENSSSCG00000046919, ENSSSCG00000024062<br/>(ACTL8), ENSSSCG00000043698, ENSSSCG00000051351,<br/>ENSSSCG00000020992 (IGSF21)</i> | Oleic acid content,<br>Monounsaturated fatty acid<br>content, Monounsaturated<br>fatty acid to saturated fatty<br>acid ratio, Palmitoleic acid<br>content, Linoleic acid<br>content, age at puberty,<br>intramuscular fat content,<br>backfat at last rib, cis-<br>Vaccenic acid content |
| SSC16:<br>4,863,778-<br>5,304,243    | 0.22(13) | <i>ENSSSCG00000028239 (FBXL7)</i>                                                                                                                                                                                                                                                                                         | Myristic acid content, hind<br>leg conformation                                                                                                                                                                                                                                          |
| SSC1:<br>199,936,889-<br>201,064,583 | 0.21(14) | <i>ENSSSCG00000050021, ENSSSCG00000005131 (DMRTA1),<br/>ENSSSCG00000050165, ENSSSCG00000034120 (CDKN2B),<br/>ENSSSCG00000005134, ENSSSCG00000005135 (MTAP),<br/>ENSSSCG00000041931, ENSSSCG00000045977</i>                                                                                                                | Conductivity 45 minutes<br><i>post-mortem</i> , external fat on<br>ham, adipocyte diameter                                                                                                                                                                                               |
| SSC6:<br>21,846,594-<br>22,591,224   | 0.21(16) | <i>ENSSSCG00000043338, ENSSSCG00000047750,<br/>ENSSSCG00000045327</i>                                                                                                                                                                                                                                                     | Body length, drip loss, loin<br>pH 24 hours <i>post-mortem</i> ,<br>average daily gain                                                                                                                                                                                                   |
| SSC9:<br>64,410,416-<br>65,286,501   | 0.21(16) | <i>ENSSSCG00000015273 (ATP2B4), ENSSSCG00000033768 (LAX1),<br/>ENSSSCG00000028035, ENSSSCG00000023562,<br/>ENSSSCG00000015277 (SOX13), ENSSSCG00000015276 (ETNK2),<br/>ENSSSCG00000031235 (REN), ENSSSCG00000038350 (KISS1),<br/>ENSSSCG00000015281 (PLEKHA6), ENSSSCG00000020589,</i>                                    | Coping behavior                                                                                                                                                                                                                                                                          |

*ENSSSCG00000048468, ENSSSCG00000015282 (PPP1R15B),  
ENSSSCG00000015283 (PIK3C2B), ENSSSCG00000015284 (MDM4),  
ENSSSCG00000034803, ENSSSCG00000015285 (LRRN2)*

|                                     |          |                                                                                                                                                                                                                                                                                         |                                                                                                                                                                                                              |
|-------------------------------------|----------|-----------------------------------------------------------------------------------------------------------------------------------------------------------------------------------------------------------------------------------------------------------------------------------------|--------------------------------------------------------------------------------------------------------------------------------------------------------------------------------------------------------------|
| SSC8:<br>16,971,073-<br>17,295,697  | 0.21(11) | <i>ENSSSCG00000008754 (GBA3)</i>                                                                                                                                                                                                                                                        | Litter size, birth weight<br>variability                                                                                                                                                                     |
| SSC6:<br>89,485,894-<br>90,353,325  | 0.21(11) | <i>ENSSSCG000000050185, ENSSSCG00000032078 (ZNF362),<br/>ENSSSCG00000032224 (A3GALT2), ENSSSCG00000025344 (PHC2),<br/>ENSSSCG00000003621 (ZSCAN20), ENSSSCG00000042252,<br/>ENSSSCG00000003622, ENSSSCG00000047402,<br/>ENSSSCG00000049113, ENSSSCG00000021247 (HMGB4)</i>              | Backfat at rump, backfat at<br>mid-back                                                                                                                                                                      |
| SSC16:<br>40,635,936-<br>41,985,204 | 0.21(14) | <i>ENSSSCG00000046595, ENSSSCG00000030186 (KIF2A),<br/>ENSSSCG00000031990 (DIMIT1), ENSSSCG00000016938 (IPO11),<br/>ENSSSCG00000020338, ENSSSCG00000037608 (LRRC70),<br/>ENSSSCG00000048063, ENSSSCG00000020281,<br/>ENSSSCG00000046520, ENSSSCG00000043802,<br/>ENSSSCG00000049006</i> | Arachidic acid to stearic acid<br>ratio, Cis-11-Eicosenoic acid<br>to oleic acid ratio,<br>Eicosenoic acid to<br>eicosanoic acid ratio, Loin<br>muscle area, Loin muscle<br>depth, Arachidic acid<br>content |
| SSC9:<br>24,642,230-<br>25,414,898  | 0.20(13) | <i>ENSSSCG00000014935</i>                                                                                                                                                                                                                                                               | Intramuscular fat content,<br>Hind leg conformation                                                                                                                                                          |
| SSC9:<br>45,356,730-<br>45,626,011  | 0.20(11) | <i>ENSSSCG00000015085 (IL10RA), ENSSSCG00000050318 (SMIM35),<br/>ENSSSCG00000015086 (TMPRSS4), ENSSSCG00000029199,<br/>ENSSSCG00000021651 (SCN2B), ENSSSCG00000015089 (JAML),<br/>ENSSSCG00000015090 (MPZL3), ENSSSCG00000015091,<br/>ENSSSCG00000040140</i>                            | Liver weight                                                                                                                                                                                                 |
| SSC11: 244-<br>307,678              | 0.20(10) | <i>ENSSSCG00000047805, ENSSSCG00000022638 (ATP12A),<br/>ENSSSCG00000049484, ENSSSCG00000009572 (RNF17),<br/>ENSSSCG00000029393 (CENPJ)</i>                                                                                                                                              | Total number of piglets born<br>alive                                                                                                                                                                        |
| SSC2:<br>5,034,464-<br>5,479,542    | 0.20(12) | <i>ENSSSCG00000012903 (PITPNM1), ENSSSCG00000012904 (AIP),<br/>ENSSSCG00000044979, ENSSSCG00000012905 (TMEM134),<br/>ENSSSCG00000012906 (CABP4), ENSSSCG00000033777 (GPR152),</i>                                                                                                       | Average backfat thickness,<br>backfat at last lumbar,                                                                                                                                                        |

|                                      |          |                                                                                                                                                                                                                                                                                                                                                                                                                                                                                                                       |                                                              |
|--------------------------------------|----------|-----------------------------------------------------------------------------------------------------------------------------------------------------------------------------------------------------------------------------------------------------------------------------------------------------------------------------------------------------------------------------------------------------------------------------------------------------------------------------------------------------------------------|--------------------------------------------------------------|
|                                      |          | <i>ENSSSCG00000012920 (CORO1B), ENSSSCG00000012909 (PTPRCAP), ENSSSCG00000012910 (RPS6KB2), ENSSSCG00000012911 (CARNS1), ENSSSCG00000012912 (TBC1D10C), ENSSSCG00000012913, ENSSSCG00000012914 (RAD9A), ENSSSCG00000043645, ENSSSCG00000012915, ENSSSCG00000012916, ENSSSCG00000048979, ENSSSCG00000027956 (SSH3), ENSSSCG00000012917 (ANKRD13D), ENSSSCG00000012918 (GRK2), ENSSSCG00000029637 (KDM2A), ENSSSCG00000022726 (RHOD), ENSSSCG00000024837 (SYT12), ENSSSCG00000040729 (C11orf86), ENSSSCG00000049464</i> | backfat at tenth rib, loin pH<br>24 hours <i>post-mortem</i> |
| SSC7:<br>118,891,334-<br>119,330,129 | 0.19(14) | <i>ENSSSCG00000041330, ENSSSCG00000046605, ENSSSCG00000042232</i>                                                                                                                                                                                                                                                                                                                                                                                                                                                     | Cortisol level                                               |
| SSC11:<br>83,965,860-<br>84,319,272  | 0.19(10) | .                                                                                                                                                                                                                                                                                                                                                                                                                                                                                                                     | .                                                            |
| SSC1:<br>184,125,931-<br>184,917,301 | 0.19(11) | <i>ENSSSCG00000023408 (SAMD4A), ENSSSCG00000042101, ENSSSCG00000049819, ENSSSCG00000035715 (GCH1), ENSSSCG00000005052 (WDHD1), ENSSSCG00000032332 (SOCS4), ENSSSCG00000005054 (MAPK1IP1L), ENSSSCG00000005055 (LGALS3), ENSSSCG00000005056 (DLGAP5), ENSSSCG00000005057 (FBXO34), ENSSSCG00000047403, ENSSSCG00000005058 (ATG14), ENSSSCG00000005059 (TBPL2), ENSSSCG00000019668, ENSSSCG00000005060 (KTN1)</i>                                                                                                       | Obesity index                                                |
| SSC3:<br>140,363,332-<br>141,033,116 | 0.19(12) | .                                                                                                                                                                                                                                                                                                                                                                                                                                                                                                                     | .                                                            |
| SSC1:<br>3,560,483-<br>4,058,074     | 0.19(11) | <i>ENSSSCG00000044274, ENSSSCG00000049643</i>                                                                                                                                                                                                                                                                                                                                                                                                                                                                         | .                                                            |
| SSC18:<br>24,758,016-<br>25,209,980  | 0.19(12) | <i>ENSSSCG00000016611 (CADPS2), ENSSSCG00000031221 (FEZF1), ENSSSCG00000016613 (AASS), ENSSSCG00000016614 (PTPRZ1)</i>                                                                                                                                                                                                                                                                                                                                                                                                | Front feet conformation                                      |

|                                       |          |                                                                                                                                                                                                                                                                                                                                                                                                                                                                                                                                                                                                                                                                                                                                                                                                                                      |                                                                                              |
|---------------------------------------|----------|--------------------------------------------------------------------------------------------------------------------------------------------------------------------------------------------------------------------------------------------------------------------------------------------------------------------------------------------------------------------------------------------------------------------------------------------------------------------------------------------------------------------------------------------------------------------------------------------------------------------------------------------------------------------------------------------------------------------------------------------------------------------------------------------------------------------------------------|----------------------------------------------------------------------------------------------|
| SSC4:<br>95,686,177-<br>96,114,909    | 0.18(11) | <i>ENSSSCG00000038125 (NUP210L), ENSSSCG00000031838 (RPS27),<br/> ENSSSCG00000006564, ENSSSCG00000006559,<br/> ENSSSCG00000006560 (CREB3L4), ENSSSCG00000006561<br/> (SLC39A1), ENSSSCG00000006567 (CRTC2), ENSSSCG00000006568<br/> (DENND4B), ENSSSCG00000006562 (GATAD2B),<br/> ENSSSCG00000050567, ENSSSCG00000050118,<br/> ENSSSCG00000006571 (INTS3), ENSSSCG00000006569 (SLC27A3),<br/> ENSSSCG00000043560, ENSSSCG00000031753,<br/> ENSSSCG00000006572 (NPR1), ENSSSCG00000028553 (ILF2),<br/> ENSSSCG00000034159 (SNAPIN), ENSSSCG00000031053 (S100A1),<br/> ENSSSCG00000022107 (CHTOP), ENSSSCG00000038991,<br/> ENSSSCG00000006582, ENSSSCG00000006581,<br/> ENSSSCG00000006580 (S100A2), ENSSSCG00000006579 (S100A3),<br/> ENSSSCG00000006578 (S100A4), ENSSSCG00000006577 (S100A5),<br/> ENSSSCG00000021084 (S100A6)</i> | Litter size, total number of<br>piglets born alive                                           |
| SSC9:<br>24,155,728-<br>24,432,100    | 0.18(10) | <i>ENSSSCG00000041757, ENSSSCG00000041340</i>                                                                                                                                                                                                                                                                                                                                                                                                                                                                                                                                                                                                                                                                                                                                                                                        | .                                                                                            |
| SSC1:<br>63,025,137-<br>63,236,510    | 0.18(10) | .                                                                                                                                                                                                                                                                                                                                                                                                                                                                                                                                                                                                                                                                                                                                                                                                                                    | Palmitic acid content,<br>saturated fatty acid content,<br>unsaturated fatty acid<br>content |
| SSC1:<br>61,534,580-<br>62,058,511    | 0.17(10) | <i>ENSSSCG00000050706</i>                                                                                                                                                                                                                                                                                                                                                                                                                                                                                                                                                                                                                                                                                                                                                                                                            | Dressing percentage, fat<br>androstene level,<br>mummified pigs                              |
| SSC8:<br>14,413,402-<br>14,705,207    | 0.17(10) | .                                                                                                                                                                                                                                                                                                                                                                                                                                                                                                                                                                                                                                                                                                                                                                                                                                    | .                                                                                            |
| SSC15:<br>150,448,862-<br>150,829,050 | 0.17(10) | .                                                                                                                                                                                                                                                                                                                                                                                                                                                                                                                                                                                                                                                                                                                                                                                                                                    | .                                                                                            |

---

|                                    |          |                                                                              |             |
|------------------------------------|----------|------------------------------------------------------------------------------|-------------|
| SSC9:<br>19,155,863-<br>19,459,321 | 0.17(10) | <i>ENSSSCG00000014904 (DLG2), ENSSSCG00000050112,<br/>ENSSSCG00000049439</i> | Litter size |
|------------------------------------|----------|------------------------------------------------------------------------------|-------------|

---

**Location:** indicates the chromosome number (SSC1 to SSC18), followed by the starting and end position of the genomic window(s) in base pairs; **Var(%)**: the percental variance explained by the most relevant 10-SNP window within the region of interest; **N SNP**: number of SNP marker included in the genomic region identified; **Positional genes**: Ensembl gene stable ID (with official gene symbol when known) mapped to the genomic regions identified; **QTL traits**: indicates which traits have known QTLs mapped within the genomic region of interest, based on QTLs reported in the Pig QTL database (<https://www.animalgenome.org/cgi-bin/QTLdb/SS/index>).
