# Supplementary material
Source: publisher figshare collection journal article supplement (https://frontiersin.figshare.com/ndownloader/files/23547128)
Supplement: Supplementary file 17 [file 23547128]

**Table S4a:** Significant windows for the intercept term on average birth weight (ABW) as regressed on average relative humidity 107 to 114 days into pregnancy in the Yorkshire population of the Maschhoffs breeding company (TML\_Y5).

| Location                           | Var(%)<br>and N<br>SNPs in<br>brackets | Positional genes                                                                                                                                                                                                                                                                                                                                                                                                                                                                                                                                                                                                                                                                                                                                                                                                                                                                     | QTL traits                                                                                                                                                                                                                                                                                                                                      |
|------------------------------------|----------------------------------------|--------------------------------------------------------------------------------------------------------------------------------------------------------------------------------------------------------------------------------------------------------------------------------------------------------------------------------------------------------------------------------------------------------------------------------------------------------------------------------------------------------------------------------------------------------------------------------------------------------------------------------------------------------------------------------------------------------------------------------------------------------------------------------------------------------------------------------------------------------------------------------------|-------------------------------------------------------------------------------------------------------------------------------------------------------------------------------------------------------------------------------------------------------------------------------------------------------------------------------------------------|
| SSC9:<br>75,823,479-<br>81,214,756 | 0.42(55)                               | <p> <i>ENSSSCG00000015336 (SLC25A13), ENSSSCG00000051379, ENSSSCG00000047863, ENSSSCG00000015337, ENSSSCG00000051115, ENSSSCG00000047552, ENSSSCG00000048105, ENSSSCG00000049944, ENSSSCG00000051124, ENSSSCG00000033314 (DLX6), ENSSSCG00000038838, ENSSSCG00000023850, ENSSSCG00000023592 (TAC1), ENSSSCG00000045298, ENSSSCG00000015340, ENSSSCG00000050392, ENSSSCG00000038187, ENSSSCG00000049770, ENSSSCG00000015342 (COL28A1), ENSSSCG00000015343 (MIOS), ENSSSCG00000023886 (RPA3), ENSSSCG00000036169 (UMAD1), ENSSSCG00000015345 (GLCCII), ENSSSCG00000015346 (ICA1), ENSSSCG00000046846, ENSSSCG00000037207 (NXPH1), ENSSSCG00000045901, ENSSSCG00000046900, ENSSSCG00000042925, ENSSSCG00000051507, ENSSSCG00000051543, ENSSSCG00000024313, ENSSSCG00000027591, ENSSSCG00000021544, ENSSSCG00000026722 (PHF14), ENSSSCG00000047616, ENSSSCG00000015350 (THSD7A)</i> </p> | <p> 45 min-24 hours pH decline, dressing percentage, oiliness, PRRS viral load, piglet mortality, average daily gain, immunocrit, number of non-viable fetuses, body length, hip structure, front leg conformation, hind leg conformation, front feet conformation, gait score (overall), rib shape, semen pH, anal atresia, spleen weight </p> |
| SSC9:<br>55,824,884-<br>58,228,279 | 0.38(28)                               | <p> <i>ENSSSCG00000021573, ENSSSCG00000015238 (ARHGAP32), ENSSSCG00000043746, ENSSSCG00000036157 (BARX2), ENSSSCG00000041877, ENSSSCG00000050593, ENSSSCG00000041798, ENSSSCG00000045608, ENSSSCG00000050270, ENSSSCG00000040319, ENSSSCG00000015241 (TMEM45B), ENSSSCG00000015242 (NFRKB), ENSSSCG00000015243 (PRDM10), ENSSSCG00000015244 (APLP2), ENSSSCG00000015246 (ST14), ENSSSCG00000015247 (ZBTB44), ENSSSCG00000046782, ENSSSCG00000015249 (ADAMTS8), ENSSSCG00000015250 (ADAMTS15), ENSSSCG00000042049, ENSSSCG00000015252 (SNX19), ENSSSCG00000048987, ENSSSCG00000020352, ENSSSCG00000048504, ENSSSCG00000045830, ENSSSCG00000015253 (NTM)</i> </p>                                                                                                                                                                                                                      | <p> Hind leg conformation, hind feet conformation, fat percentage in carcass, lean meat percentage, meat to fat ratio, carcass length, backfat at rump </p>                                                                                                                                                                                     |

|                                       |          |                                                                                                                                                                                                                                                                                                                                                                                                                                                                                                                                                                                 |                                                                                                                                                                                                                                                                                                                          |
|---------------------------------------|----------|---------------------------------------------------------------------------------------------------------------------------------------------------------------------------------------------------------------------------------------------------------------------------------------------------------------------------------------------------------------------------------------------------------------------------------------------------------------------------------------------------------------------------------------------------------------------------------|--------------------------------------------------------------------------------------------------------------------------------------------------------------------------------------------------------------------------------------------------------------------------------------------------------------------------|
| SSC14:<br>114,610,574-<br>117,846,180 | 0.37(51) | <i>ENSSSCG00000010604 (SH3PXD2A), ENSSSCG00000034344,</i><br><i>ENSSSCG00000010605 (STN1), ENSSSCG00000010606 (SLK),</i><br><i>ENSSSCG00000010607 (COL17A1), ENSSSCG00000049538,</i><br><i>ENSSSCG00000010608 (SFR1), ENSSSCG00000010609 (CFAP43),</i><br><i>ENSSSCG00000010610, ENSSSCG00000022351, ENSSSCG00000030271</i><br><i>(GSTO2), ENSSSCG00000010613 (ITPRIP), ENSSSCG00000010614 (CFAP58),</i><br><i>ENSSSCG00000010617 (SORCS3), ENSSSCG00000033470,</i><br><i>ENSSSCG00000018956, ENSSSCG00000020604, ENSSSCG00000047988,</i><br><i>ENSSSCG00000030026 (SORCS1)</i> | Dressing percentage,<br>Palmitoleic acid content,<br>Stearic acid content,<br>Monounsaturated fatty<br>acid content, loin pH 24<br>hours <i>post-mortem</i> ,<br>hematocrit, red blood cell<br>count, litter size, gestation<br>length, Palmitic acid<br>content, Oleic acid<br>content, Saturated fatty<br>acid content |
| SSC18:<br>31,560,363-<br>32,946,579   | 0.34(19) | <i>ENSSSCG00000016639 (FOXP2), ENSSSCG00000045847, ENSSSCG00000016640</i><br><i>(PPP1R3A), ENSSSCG00000051047, ENSSSCG00000048496,</i><br><i>ENSSSCG00000042801, ENSSSCG00000048245, ENSSSCG00000016642</i><br><i>(GPR85), ENSSSCG00000021466 (BMT2), ENSSSCG00000016643 (TMEM168)</i>                                                                                                                                                                                                                                                                                          | Chronic pleuritis,<br><i>Salmonella</i> count in<br>spleen, hematocrit,<br>cooking loss, loin pH 24<br>hours <i>post-mortem</i> , birth<br>weight variability,<br>average daily gain, hip<br>structure                                                                                                                   |
| SSC9:<br>58,398,881-<br>60,527,068    | 0.34(25) | <i>ENSSSCG00000015253 (NTM), ENSSSCG00000018246, ENSSSCG00000049894,</i><br><i>ENSSSCG00000037534 (OPCML), ENSSSCG00000048884,</i><br><i>ENSSSCG00000045081, ENSSSCG00000025612, ENSSSCG00000015255</i><br><i>(IGSF9B)</i>                                                                                                                                                                                                                                                                                                                                                      | Body weight, chest<br>circumference                                                                                                                                                                                                                                                                                      |
| SSC1:<br>4,058,074-<br>4,894,265      | 0.34(20) | <i>ENSSSCG00000050396, ENSSSCG00000046688, ENSSSCG00000042992,</i><br><i>ENSSSCG00000004029 (QKI)</i>                                                                                                                                                                                                                                                                                                                                                                                                                                                                           | .                                                                                                                                                                                                                                                                                                                        |
| SSC6:<br>82,457,398-<br>84,047,659    | 0.32(35) | <i>ENSSSCG00000038994 (CLIC4), ENSSSCG00000041070, ENSSSCG00000032686</i><br><i>(RUNX3), ENSSSCG00000037664, ENSSSCG00000032169,</i><br><i>ENSSSCG00000037481 (SYF2), ENSSSCG00000034449 (RSRP1),</i><br><i>ENSSSCG00000024267 (TMEM50A), ENSSSCG00000026791,</i><br><i>ENSSSCG00000030682, ENSSSCG00000003549 (LDLRAP1),</i><br><i>ENSSSCG00000050714, ENSSSCG00000023235 (MAN1C1),</i>                                                                                                                                                                                        | Meat color a*, thoracic<br>vertebra number,<br>melanoma susceptibility,<br>birth weight                                                                                                                                                                                                                                  |

*ENSSSCG00000003554 (SELENON), ENSSSCG00000003553 (MTFR1L),*  
*ENSSSCG00000003552 (AUNIP), ENSSSCG00000003551 (PAQR7),*  
*ENSSSCG00000026257 (STMN1), ENSSSCG00000043402, ENSSSCG00000038619*  
*(PAFAH2), ENSSSCG00000029558 (EXTL1), ENSSSCG00000026386,*  
*ENSSSCG00000027684, ENSSSCG00000041335, ENSSSCG00000030660*  
*(PDIK1L), ENSSSCG00000031074 (FAM110D), ENSSSCG00000041671*  
*(Clorf232), ENSSSCG00000045776, ENSSSCG00000028387 (CNKSR1),*  
*ENSSSCG00000026526 (CATSPER4), ENSSSCG00000045528,*  
*ENSSSCG00000026731 (CEP85), ENSSSCG00000033546 (UBXN11),*  
*ENSSSCG00000034937 (SH3BGR13), ENSSSCG00000033539 (CRYBG2),*  
*ENSSSCG00000040579 (ZNF683), ENSSSCG00000003557,*  
*ENSSSCG00000033516, ENSSSCG00000003555, ENSSSCG00000049882,*  
*ENSSSCG00000048981, ENSSSCG00000003558 (RPS6KA1),*  
*ENSSSCG00000003559 (ARID1A)*

|                                    |          |                                                                                                                                                                                                                                                                                                                                                                                                                                                                                                                                                                                                                                                                                                                                                                                                                                                                                                                                                                                                                                                                                                                            |                                                                                                                                                         |
|------------------------------------|----------|----------------------------------------------------------------------------------------------------------------------------------------------------------------------------------------------------------------------------------------------------------------------------------------------------------------------------------------------------------------------------------------------------------------------------------------------------------------------------------------------------------------------------------------------------------------------------------------------------------------------------------------------------------------------------------------------------------------------------------------------------------------------------------------------------------------------------------------------------------------------------------------------------------------------------------------------------------------------------------------------------------------------------------------------------------------------------------------------------------------------------|---------------------------------------------------------------------------------------------------------------------------------------------------------|
| SSC9:<br>28,237,601-<br>28,671,488 | 0.31(16) | <i>ENSSSCG00000034879 (MAML2), ENSSSCG00000014972 (CCDC82),</i><br><i>ENSSSCG00000034924 (JRKL)</i>                                                                                                                                                                                                                                                                                                                                                                                                                                                                                                                                                                                                                                                                                                                                                                                                                                                                                                                                                                                                                        | Adrenal gland weight,<br>muscle protein<br>percentage, head weight                                                                                      |
| SSC9:<br>934,647-<br>2,952,003     | 0.31(27) | <i>ENSSSCG00000030206 (STK33), ENSSSCG00000023057 (LMO1),</i><br><i>ENSSSCG00000014580 (RIC3), ENSSSCG00000014581 (TUB),</i><br><i>ENSSSCG00000039647 (EIF3F), ENSSSCG00000042620, ENSSSCG00000014587,</i><br><i>ENSSSCG00000031202, ENSSSCG00000036687, ENSSSCG00000050659,</i><br><i>ENSSSCG00000032130, ENSSSCG00000034067, ENSSSCG00000044445,</i><br><i>ENSSSCG00000036240, ENSSSCG00000035773, ENSSSCG00000047231,</i><br><i>ENSSSCG00000031845, ENSSSCG00000050809, ENSSSCG00000036606,</i><br><i>ENSSSCG00000036929, ENSSSCG00000050053, ENSSSCG00000039848,</i><br><i>ENSSSCG00000049272, ENSSSCG00000046240, ENSSSCG00000044470,</i><br><i>ENSSSCG00000021619 (OVCH2), ENSSSCG00000049432,</i><br><i>ENSSSCG00000048244, ENSSSCG00000047740, ENSSSCG00000014598</i><br><i>(PPFIBP2), ENSSSCG00000038540, ENSSSCG00000014599 (SYT9),</i><br><i>ENSSSCG00000045371, ENSSSCG00000042696, ENSSSCG00000047897,</i><br><i>ENSSSCG00000014600, ENSSSCG00000038122, ENSSSCG00000031270</i><br><i>(OR2D2), ENSSSCG00000014602 (OR10A4), ENSSSCG00000039077,</i><br><i>ENSSSCG00000014617 (OR6A2), ENSSSCG00000049448,</i> | Hematocrit, red blood cell<br>count, red cell<br>distribution width, coping<br>behavior, litter weight,<br>plateletcrit, number of<br>mummified piglets |

|                                                                                                                                                                                           |          |                                                                                                                                                                                                                                   |                                                                                                                                                                                                                                                                                                                                                                                                                         |
|-------------------------------------------------------------------------------------------------------------------------------------------------------------------------------------------|----------|-----------------------------------------------------------------------------------------------------------------------------------------------------------------------------------------------------------------------------------|-------------------------------------------------------------------------------------------------------------------------------------------------------------------------------------------------------------------------------------------------------------------------------------------------------------------------------------------------------------------------------------------------------------------------|
| <i>ENSSSCG00000044240, ENSSSCG00000014608, ENSSSCG00000014605, ENSSSCG00000045220, ENSSSCG00000043559, ENSSSCG00000044796, ENSSSCG00000033089, ENSSSCG00000031610, ENSSSCG00000020258</i> |          |                                                                                                                                                                                                                                   |                                                                                                                                                                                                                                                                                                                                                                                                                         |
| SSC2:<br>145,257,971-<br>145,963,826                                                                                                                                                      | 0.30(19) | <i>ENSSSCG00000041721, ENSSSCG00000048807, ENSSSCG00000043421, ENSSSCG00000039309 (YIPF5), ENSSSCG00000032826 (KCTD16), ENSSSCG00000028579</i>                                                                                    | .                                                                                                                                                                                                                                                                                                                                                                                                                       |
| SSC2:<br>138,960,347-<br>139,629,298                                                                                                                                                      | 0.29(18) | <i>ENSSSCG00000032423 (SPOCK1)</i>                                                                                                                                                                                                | Intramuscular fat content                                                                                                                                                                                                                                                                                                                                                                                               |
| SSC10:<br>50,346,134-<br>51,261,717                                                                                                                                                       | 0.29(19) | <i>ENSSSCG00000028135 (PRTFDC1), ENSSSCG00000037690, ENSSSCG00000011074 (ARHGAP21), ENSSSCG00000011075 (KIAA1217), ENSSSCG00000050240, ENSSSCG00000050564</i>                                                                     | Anal atresia,<br>scrotal/inguinal hernia,<br>teat number, 3-24 hours<br>pH decline, age at puberty                                                                                                                                                                                                                                                                                                                      |
| SSC2:<br>106,921,556-<br>107,759,802                                                                                                                                                      | 0.28(21) | <i>ENSSSCG00000045323, ENSSSCG00000046316, ENSSSCG00000033364</i>                                                                                                                                                                 | Shear force, tenderness<br>score, average instron<br>(star probe) force, pH 24<br>hour post mortem (ham),<br>juiciness score, chew<br>score, drip loss, backfat at<br>first rib, flavor score,<br>cooking loss, carcass<br>fatness, marbling, shear<br>force at first peak, meat<br>color b*, meat color L*,<br>muscle fat content,<br>muscle protein<br>percentage, muscle<br>moisture percentage,<br>spinal curvature |
| SSC15:<br>137,470,306-<br>138,275,968                                                                                                                                                     | 0.25(21) | <i>ENSSSCG00000016332 (RBM44), ENSSSCG00000016331, ENSSSCG00000027723, ENSSSCG00000041251, ENSSSCG00000051289, ENSSSCG00000016334 (SCLY), ENSSSCG00000016335 (ESPNL), ENSSSCG00000026600 (KLHL30), ENSSSCG00000016337 (ERFE),</i> | Maternal infanticide,<br>number of mummified<br>piglets                                                                                                                                                                                                                                                                                                                                                                 |

*ENSSSCG00000016339 (ILKAP), ENSSSCG00000048787, ENSSSCG00000016342 (HES6), ENSSSCG00000016338 (PER2), ENSSSCG00000051024, ENSSSCG00000025228 (TRAF3IP1), ENSSSCG00000016340 (ASB1), ENSSSCG00000042914, ENSSSCG00000016343*

|                                      |          |                                                                                                                                                                                                                                                                                                                                                                                                                                                                                                                                                                                                                                                                                                                                                                                                                                                                                                                                                                                                                                                                                                                                                                                                                                                                                                                                                 |                                                                                                                                                    |
|--------------------------------------|----------|-------------------------------------------------------------------------------------------------------------------------------------------------------------------------------------------------------------------------------------------------------------------------------------------------------------------------------------------------------------------------------------------------------------------------------------------------------------------------------------------------------------------------------------------------------------------------------------------------------------------------------------------------------------------------------------------------------------------------------------------------------------------------------------------------------------------------------------------------------------------------------------------------------------------------------------------------------------------------------------------------------------------------------------------------------------------------------------------------------------------------------------------------------------------------------------------------------------------------------------------------------------------------------------------------------------------------------------------------|----------------------------------------------------------------------------------------------------------------------------------------------------|
| SSC7:<br>102,377,016-<br>102,949,951 | 0.24(13) | <i>ENSSSCG00000028942 (NRXN3)</i>                                                                                                                                                                                                                                                                                                                                                                                                                                                                                                                                                                                                                                                                                                                                                                                                                                                                                                                                                                                                                                                                                                                                                                                                                                                                                                               | Lymphocyte number,<br>white blood cell number,<br>carcass length, cholesterol<br>level, thoracic vertebra<br>number, obesity index,<br>teat number |
| SSC9:<br>3,053,106-<br>3,924,348     | 0.24(17) | <i>ENSSSCG00000014600, ENSSSCG00000014618, ENSSSCG00000024693, ENSSSCG00000029189 (DCHS1), ENSSSCG00000023080 (TPP1), ENSSSCG00000029630 (TAF10), ENSSSCG00000023272 (ILK), ENSSSCG00000023880 (RRP8), ENSSSCG00000039799, ENSSSCG00000045625, ENSSSCG00000037299, ENSSSCG00000014625 (TRIM3), ENSSSCG00000014626 (HPX), ENSSSCG00000014628 (APBB1), ENSSSCG00000014627 (SMPD1), ENSSSCG00000014633 (CAVIN3), ENSSSCG00000033806, ENSSSCG00000014630 (CNGA4), ENSSSCG00000014632 (FAM160A2), ENSSSCG00000014634 (C11orf42), ENSSSCG00000046332, ENSSSCG00000035041 (OR52W1), ENSSSCG00000045056, ENSSSCG00000050079, ENSSSCG00000044868, ENSSSCG00000040404 (OR56B4), ENSSSCG00000014639 (OR56A1), ENSSSCG00000049205, ENSSSCG00000040084, ENSSSCG00000047710, ENSSSCG00000048497 (OR52E4), ENSSSCG00000041574, ENSSSCG00000043308, ENSSSCG00000041779, ENSSSCG00000051537, ENSSSCG00000049377, ENSSSCG00000049604, ENSSSCG00000049817, ENSSSCG00000031842, ENSSSCG00000038324, ENSSSCG00000050910, ENSSSCG00000046786, ENSSSCG00000048561, ENSSSCG00000043101, ENSSSCG00000036692, ENSSSCG00000045340, ENSSSCG00000049791, ENSSSCG00000041301, ENSSSCG00000047213, ENSSSCG00000042301, ENSSSCG00000040477, ENSSSCG00000031864, ENSSSCG00000014643, ENSSSCG00000050291, ENSSSCG00000043499 (OR52E5), ENSSSCG00000044027, ENSSSCG00000048134</i> | Hemoglobin, body height                                                                                                                            |

|                                      |          |                                                                                                                                                                                                                                                                                                                                                                                                                                                                                                                                                                                                                                                                                    |                                                                                                                                     |
|--------------------------------------|----------|------------------------------------------------------------------------------------------------------------------------------------------------------------------------------------------------------------------------------------------------------------------------------------------------------------------------------------------------------------------------------------------------------------------------------------------------------------------------------------------------------------------------------------------------------------------------------------------------------------------------------------------------------------------------------------|-------------------------------------------------------------------------------------------------------------------------------------|
| SSC13:<br>32,238,776-<br>32,792,383  | 0.23(12) | <i>ENSSSCG00000011387 (RNF123), ENSSSCG00000011389 (AMIGO3),<br/> ENSSSCG00000011390 (IP6K1), ENSSSCG00000011391 (CDHR4),<br/> ENSSSCG00000011393 (UBA7), ENSSSCG00000049797, ENSSSCG00000026977<br/> (TRAIP), ENSSSCG00000025416 (CAMKV), ENSSSCG00000027992 (MST1R),<br/> ENSSSCG00000025791, ENSSSCG00000011394 (RBM6), ENSSSCG00000037003,<br/> ENSSSCG00000011395 (RBM5), ENSSSCG00000011398 (SEMA3F),<br/> ENSSSCG00000042718 (GNAT1), ENSSSCG00000011397 (SLC38A3),<br/> ENSSSCG00000011399 (GNAI2), ENSSSCG00000011400 (SEMA3B),<br/> ENSSSCG00000011401 (LSMEM2), ENSSSCG00000011402 (IFRD2),<br/> ENSSSCG00000041673, ENSSSCG00000024363 (HYAL3), ENSSSCG00000011404</i> |                                                                                                                                     |
| SSC12:<br>9,655,798-<br>10,354,335   | 0.23(15) | <i>ENSSSCG00000048915, ENSSSCG00000043713, ENSSSCG00000042724,<br/> ENSSSCG00000042576, ENSSSCG00000039947 (KCNJ2)</i>                                                                                                                                                                                                                                                                                                                                                                                                                                                                                                                                                             | Birth weight, immunocrit,<br>meat color b*, small<br>intestine length, hind leg<br>conformation                                     |
| SSC2:<br>21,028,892-<br>22,252,988   | 0.23(19) | <i>ENSSSCG00000013286 (LRRC4C), ENSSSCG00000049735,<br/> ENSSSCG00000047030, ENSSSCG00000043947</i>                                                                                                                                                                                                                                                                                                                                                                                                                                                                                                                                                                                | Conductivity 45 minutes<br>post-mortem, coping<br>behavior, sperm per<br>ejaculate                                                  |
| SSC1:<br>15,731,768-<br>16,179,177   | 0.23(15) | <i>ENSSSCG00000040966, ENSSSCG0000004093 (IYD), ENSSSCG0000004094<br/> (PPP1R14C), ENSSSCG00000035574, ENSSSCG00000032525,<br/> ENSSSCG00000033578, ENSSSCG0000004096, ENSSSCG00000041378,<br/> ENSSSCG00000026042, ENSSSCG0000004101 (LRP11)</i>                                                                                                                                                                                                                                                                                                                                                                                                                                  | Corpus luteum number,<br>obesity index                                                                                              |
| SSC1:<br>138,927,010-<br>140,260,943 | 0.23(14) | <i>ENSSSCG00000038452 (ADAMTS17), ENSSSCG0000004819 (CERS3),<br/> ENSSSCG0000004820 (LINS1), ENSSSCG0000004821 (ASB7),<br/> ENSSSCG00000047618, ENSSSCG00000038358, ENSSSCG0000004822<br/> (ALDH1A3), ENSSSCG0000004823 (LRRK1), ENSSSCG00000019106,<br/> ENSSSCG00000048312, ENSSSCG00000045683, ENSSSCG0000004825,<br/> ENSSSCG00000044912, ENSSSCG0000004826, ENSSSCG00000035584<br/> (GABRG3), ENSSSCG00000019280, ENSSSCG00000042260</i>                                                                                                                                                                                                                                      | Number of mummified<br>piglets, Linoleic acid<br>content, Monounsaturated<br>fatty acid to saturated<br>fatty acid ratio, drip loss |
| SSC9:<br>117,742,788-<br>118,481,227 | 0.22(15) | <i>ENSSSCG00000015508 (TNR), ENSSSCG00000047811, ENSSSCG00000015509<br/> (COPI), ENSSSCG00000034100 (SCARNA3), ENSSSCG00000046238,<br/> ENSSSCG00000044431, ENSSSCG00000049556, ENSSSCG00000015512<br/> (PAPPA2)</i>                                                                                                                                                                                                                                                                                                                                                                                                                                                               | Daily feed intake                                                                                                                   |

|                                       |          |                                                                                                                                                                                                                                                                                                                                                                                                                                                                         |                                                                                                                   |
|---------------------------------------|----------|-------------------------------------------------------------------------------------------------------------------------------------------------------------------------------------------------------------------------------------------------------------------------------------------------------------------------------------------------------------------------------------------------------------------------------------------------------------------------|-------------------------------------------------------------------------------------------------------------------|
| SSC14:<br>47,696,012-<br>48,356,407   | 0.22(18) | <i>ENSSSCG00000010015 (OSBP2), ENSSSCG00000010016 (MORC2),<br/> ENSSSCG00000040413, ENSSSCG00000010017, ENSSSCG00000029781,<br/> ENSSSCG00000030345 (INPP5J), ENSSSCG00000010023 (PLA2G3),<br/> ENSSSCG00000010025 (LIMK2), ENSSSCG00000010026 (PIK3IP1),<br/> ENSSSCG00000010027 (PATZ1), ENSSSCG00000010029 (DRG1),<br/> ENSSSCG00000010030 (EIF4ENIF1), ENSSSCG00000035290,<br/> ENSSSCG00000010031, ENSSSCG00000010032 (PISD), ENSSSCG00000010033<br/> (PRR14L)</i> |                                                                                                                   |
| SSC1:<br>52,520,680-<br>53,604,351    | 0.22(12) | <i>ENSSSCG00000004281 (KCNQ5), ENSSSCG00000046325,<br/> ENSSSCG00000049177, ENSSSCG00000050380, ENSSSCG00000004283,<br/> ENSSSCG00000004284, ENSSSCG00000004285, ENSSSCG00000004287,<br/> ENSSSCG00000022994 (CYB5R4), ENSSSCG00000026943 (MRAP2),<br/> ENSSSCG00000044858, ENSSSCG00000004289 (CEP162)</i>                                                                                                                                                             | Age at puberty                                                                                                    |
| SSC2:<br>108,425,985-<br>109,218,177  | 0.22(13) | <i>ENSSSCG00000014184 (PAM), ENSSSCG00000025287 (GIN1),<br/> ENSSSCG00000024999 (PIIP5K2), ENSSSCG00000049232,<br/> ENSSSCG00000043322, ENSSSCG00000045132, ENSSSCG00000042485,<br/> ENSSSCG00000038779 (C5orf30), ENSSSCG00000048901,<br/> ENSSSCG00000049923, ENSSSCG00000014186, ENSSSCG00000014187<br/> (NUDT12), ENSSSCG00000047052, ENSSSCG00000043606</i>                                                                                                        | Number of mummified piglets                                                                                       |
| SSC14:<br>46,614,469-<br>47,196,197   | 0.21(16) | <i>ENSSSCG00000009988 (THOC5), ENSSSCG00000051359 (NIPSNAP1),<br/> ENSSSCG00000028707 (NF2), ENSSSCG00000025869 (CABP7),<br/> ENSSSCG00000024279 (ZMAT5), ENSSSCG00000024550, ENSSSCG00000025186<br/> (ASCC2), ENSSSCG00000009994 (MTMR3), ENSSSCG00000043717,<br/> ENSSSCG00000046492, ENSSSCG00000009995 (HORMAD2),<br/> ENSSSCG00000045744</i>                                                                                                                       | Intramuscular fat content                                                                                         |
| SSC18:<br>35,927,576-<br>36,434,158   | 0.21(11) | <i>ENSSSCG00000044944, ENSSSCG00000043837, ENSSSCG00000048016,<br/> ENSSSCG00000049426</i>                                                                                                                                                                                                                                                                                                                                                                              |                                                                                                                   |
| SSC15:<br>133,730,356-<br>134,172,205 | 0.20(12) | <i>ENSSSCG00000016301 (SAG), ENSSSCG00000009432 (DGKD),<br/> ENSSSCG00000042816, ENSSSCG00000016306 (USP40), ENSSSCG00000036274,<br/> ENSSSCG00000049095, ENSSSCG00000028217, ENSSSCG00000016305<br/> (MROH2A), ENSSSCG00000016313 (HJURP)</i>                                                                                                                                                                                                                          | Loin pH 24 hours <i>post-mortem</i> , drip loss, cooking loss, ham pH 24 hours <i>post-mortem</i> , meat color a* |

|                                      |          |                                                                                                                                                                                                                                                                                                                                                                                                                                                                                                                     |                                                                                                                                                                                        |
|--------------------------------------|----------|---------------------------------------------------------------------------------------------------------------------------------------------------------------------------------------------------------------------------------------------------------------------------------------------------------------------------------------------------------------------------------------------------------------------------------------------------------------------------------------------------------------------|----------------------------------------------------------------------------------------------------------------------------------------------------------------------------------------|
| SSC4:<br>43,833,235-<br>44,642,552   | 0.20(14) | <i>ENSSSCG00000035526, ENSSSCG00000046234, ENSSSCG00000050430,<br/>ENSSSCG00000006115 (RUNX1T1)</i>                                                                                                                                                                                                                                                                                                                                                                                                                 | Drip loss, teat number                                                                                                                                                                 |
| SSC13:<br>95,329,431-<br>97,080,352  | 0.20(10) | <i>ENSSSCG00000026718 (PLCH1), ENSSSCG00000048315, ENSSSCG00000025316<br/>(SLC33A1), ENSSSCG00000028855 (GMPS), ENSSSCG00000019096,<br/>ENSSSCG00000011724, ENSSSCG00000025810 (KCNAB1),<br/>ENSSSCG00000026410, ENSSSCG00000047110, ENSSSCG00000030567 (SSR3),<br/>ENSSSCG00000046794, ENSSSCG00000048772, ENSSSCG00000027646<br/>(TIPARP), ENSSSCG00000045498, ENSSSCG00000026579,<br/>ENSSSCG00000047487, ENSSSCG00000041932, ENSSSCG00000048257,<br/>ENSSSCG00000029352 (CCNL1), ENSSSCG00000011726 (VEPH1)</i> | Total number of piglets<br>born alive, spleen weight                                                                                                                                   |
| SSC4:<br>12,527,995-<br>13,008,743   | 0.20(11) | <i>ENSSSCG00000048613, ENSSSCG00000042693, ENSSSCG00000050281,<br/>ENSSSCG00000045505, ENSSSCG00000049874</i>                                                                                                                                                                                                                                                                                                                                                                                                       | Intramuscular fat content,<br>teat number, fat-cuts<br>percentage                                                                                                                      |
| SSC14:<br>46,043,439-<br>46,408,884  | 0.20(11) | <i>ENSSSCG00000009971 (ZNRf3), ENSSSCG00000025404 (C22orf31),<br/>ENSSSCG00000009972 (KREMEN1), ENSSSCG00000009975 (EMID1),<br/>ENSSSCG00000009973 (RHBDD3), ENSSSCG00000009974 (EWSR1)</i>                                                                                                                                                                                                                                                                                                                         | Body weight (birth)                                                                                                                                                                    |
| SSC6:<br>75,839,337-<br>76,292,118   | 0.19(12) | <i>ENSSSCG00000003481 (PADI1), ENSSSCG00000003482 (PADI3),<br/>ENSSSCG00000003483 (PADI4), ENSSSCG00000003484 (PADI6),<br/>ENSSSCG00000003485 (RCC2), ENSSSCG00000003486 (ARHGEF10L),<br/>ENSSSCG00000046919</i>                                                                                                                                                                                                                                                                                                    | Oleic acid content,<br>Monounsaturated fatty<br>acid content,<br>Monounsaturated fatty<br>acid to saturated fatty<br>acid ratio, Palmitoleic<br>acid content, Linoleic<br>acid content |
| SSC15:<br>16,171,215-<br>16,718,985  | 0.19(12) | <i>ENSSSCG00000015690 (UBXN4), ENSSSCG00000015692 (R3HDM1),<br/>ENSSSCG00000019503, ENSSSCG00000015694 (ZRANB3),<br/>ENSSSCG00000018804, ENSSSCG00000039294, ENSSSCG00000045925</i>                                                                                                                                                                                                                                                                                                                                 | Coping behavior, platelet<br>count                                                                                                                                                     |
| SSC3:<br>128,201,541-<br>128,497,956 | 0.19(10) | <i>ENSSSCG00000046300, ENSSSCG00000043310</i>                                                                                                                                                                                                                                                                                                                                                                                                                                                                       | .                                                                                                                                                                                      |

|                                      |          |                                                                                                                                                                                                                                                                                                                                                                                                |                                                                                          |
|--------------------------------------|----------|------------------------------------------------------------------------------------------------------------------------------------------------------------------------------------------------------------------------------------------------------------------------------------------------------------------------------------------------------------------------------------------------|------------------------------------------------------------------------------------------|
| SSC6:<br>133,060,727-<br>133,334,031 | 0.19(12) |                                                                                                                                                                                                                                                                                                                                                                                                |                                                                                          |
| SSC12:<br>35,139,128-<br>36,028,648  | 0.19(11) | ENSSSCG00000038932 (PPM1E), ENSSSCG00000023727 (TRIM37),<br>ENSSSCG00000034217 (SKA2), ENSSSCG00000018920 (MIR454),<br>ENSSSCG00000028212 (MIR301A), ENSSSCG00000024145 (PRR11),<br>ENSSSCG00000024411, ENSSSCG00000030262, ENSSSCG00000035400 (YPEL2),<br>ENSSSCG00000043506, ENSSSCG00000017665 (DHX40), ENSSSCG00000022659<br>(CLTC), ENSSSCG00000017667 (PTRH2), ENSSSCG00000017668 (VMP1) | Backfat between 3 <sup>rd</sup> and<br>4 <sup>th</sup> last ribs                         |
| SSC9:<br>47,166,781-<br>47,399,155   | 0.18(10) | ENSSSCG00000015126 (TRIM29), ENSSSCG00000044597,<br>ENSSSCG00000036307, ENSSSCG00000028237 (POU2F3)                                                                                                                                                                                                                                                                                            | Dressing percentage,<br>backfat between 3 <sup>rd</sup> and<br>4 <sup>th</sup> last ribs |
| SSC14:<br>59,610,682-<br>60,318,934  | 0.18(10) | ENSSSCG00000010182 (CAPN9), ENSSSCG00000010184 (AGT),<br>ENSSSCG00000010183 (COG2), ENSSSCG00000048229, ENSSSCG00000021027<br>(PGBD5), ENSSSCG00000010185 (GALNT2), ENSSSCG00000046435,<br>ENSSSCG00000010187 (TAF5L), ENSSSCG00000010186 (URB2),<br>ENSSSCG00000010188 (ABCB10)                                                                                                               |                                                                                          |
| SSC6:<br>81,775,011-<br>82,207,445   | 0.18(10) | ENSSSCG00000024834, ENSSSCG00000036534 (MYOM3),<br>ENSSSCG00000038848 (IL22RA1), ENSSSCG00000032860 (IFNLR1),<br>ENSSSCG00000003539 (GRHL3), ENSSSCG00000003541 (STPG1),<br>ENSSSCG00000003543 (NIPAL3), ENSSSCG00000024818 (RCAN3),<br>ENSSSCG00000003547 (NCMAP)                                                                                                                             | Litter weight                                                                            |
| SSC15:<br>18,365,207-<br>18,972,285  | 0.18(10) | ENSSSCG00000041827, ENSSSCG00000043458, ENSSSCG00000048606,<br>ENSSSCG00000046592, ENSSSCG00000042339, ENSSSCG00000043451,<br>ENSSSCG00000046308, ENSSSCG00000043328, ENSSSCG00000023479,<br>ENSSSCG00000051377                                                                                                                                                                                | Front feet conformation                                                                  |
| SSC10:<br>2,344,592-<br>2,801,475    | 0.18(11) | ENSSSCG00000050890, ENSSSCG00000043005, ENSSSCG00000042899                                                                                                                                                                                                                                                                                                                                     | LDL cholesterol                                                                          |
| SSC9:<br>53,428,993-<br>53,975,532   | 0.18(10) | ENSSSCG00000015231 (DCPS), ENSSSCG00000015232 (ST3GAL4),<br>ENSSSCG00000015234 (KIRREL3)                                                                                                                                                                                                                                                                                                       |                                                                                          |

|                                      |          |                                                                                                                                                                                                                                                                           |                 |
|--------------------------------------|----------|---------------------------------------------------------------------------------------------------------------------------------------------------------------------------------------------------------------------------------------------------------------------------|-----------------|
| SSC9:<br>103,696,209-<br>105,612,360 | 0.18(10) | <i>ENSSSCG00000015426 (RELN), ENSSSCG00000015427 (ORC5),<br/>ENSSSCG00000035554 (LHFPL3), ENSSSCG00000029082 (KMT2E),<br/>ENSSSCG00000026110 (SRPK2), ENSSSCG00000015428 (PUS7),<br/>ENSSSCG00000046436, ENSSSCG00000015430 (RINT1), ENSSSCG00000015432<br/>(ATXN7L1)</i> | .               |
| SSC5:<br>80,795,197-<br>81,281,908   | 0.18(10) | <i>ENSSSCG00000000854, ENSSSCG00000034578, ENSSSCG00000043357,<br/>ENSSSCG00000000856 (PAH)</i>                                                                                                                                                                           | Coping behavior |
