# Supplementary material
Source: publisher figshare collection journal article supplement (https://frontiersin.figshare.com/ndownloader/files/23547128)
Supplement: Supplementary file 18 [file 23547128]

**Table S2b:** Significant genomic windows for the slope term of the reaction norm on total number of piglets born (TNB) as regressed on the Average Relative Humidity 14 to 7 days before conception in the Smithfield Premium Genetics (SPG) Landrace population (SPG\_LR).

| Location                            | Var(%)<br>and N<br>SNPs in<br>brackets | Positional genes                                                                                                                                                                                                                                                                                                                                        | QTL traits                                                                                                                                                                                                                                        |
|-------------------------------------|----------------------------------------|---------------------------------------------------------------------------------------------------------------------------------------------------------------------------------------------------------------------------------------------------------------------------------------------------------------------------------------------------------|---------------------------------------------------------------------------------------------------------------------------------------------------------------------------------------------------------------------------------------------------|
| SSC3:<br>35,273,575-<br>36,463,191  | 0.32(23)                               | <i>ENSSSCG00000007917 (RBFOX1), ENSSSCG00000051042, ENSSSCG00000046506, ENSSSCG00000020433, ENSSSCG00000051435</i>                                                                                                                                                                                                                                      | CD8-negative leukocyte percentage, CD8-positive leukocyte percentage, CD3-negative                                                                                                                                                                |
| SSC3:<br>60,835,887-<br>62,535,813  | 0.31(18)                               | <i>ENSSSCG00000035540</i>                                                                                                                                                                                                                                                                                                                               | Feed conversion ratio, backfat thickness between 3 <sup>rd</sup> and 4 <sup>th</sup> rib, ham weight, CD8-positive leukocyte percentage, CD3-negative, CD8-negative leukocyte percentage, average daily gain, Japanese color scale, meat color L* |
| SSC11:<br>80,629,582-<br>81,387,249 | 0.31(19)                               | .                                                                                                                                                                                                                                                                                                                                                       | Conductivity 45 minutes <i>post-mortem</i> , hind leg conformation                                                                                                                                                                                |
| SSC9:<br>28,682,617-<br>29,350,733  | 0.28(17)                               | <i>ENSSSCG00000039906, ENSSSCG00000020347</i>                                                                                                                                                                                                                                                                                                           | Litter weight, adrenal gland weight, hind leg conformation, gestation length                                                                                                                                                                      |
| SSC10:<br>17,948,352-<br>18,287,728 | 0.26(10)                               | <i>ENSSSCG00000010879 (KIF26B), ENSSSCG00000022034</i>                                                                                                                                                                                                                                                                                                  | Intramuscular fat content, CD4-positive, total number of piglets born alive, melanoma susceptibility                                                                                                                                              |
| SSC14:<br>37,500,868-<br>39,015,629 | 0.26(19)                               | <i>ENSSSCG00000049452, ENSSSCG00000043926, ENSSSCG00000009865 (TBX3), ENSSSCG00000009866, ENSSSCG00000009867 (TBX5), ENSSSCG00000019229, ENSSSCG00000009868 (RBM19), ENSSSCG00000042669, ENSSSCG00000009869 (LHX5), ENSSSCG00000009870 (SDSL), ENSSSCG00000036865 (SDS), ENSSSCG00000009872 (PLBD2), ENSSSCG00000047984, ENSSSCG00000009873 (DTX1),</i> | Obesity index, saturated fatty acid content, pH 45 minutes <i>post-mortem</i>                                                                                                                                                                     |

|                                                                                                                                                                                                                                                                                                                   |          |                                                                                                                                                                                                                                                                                                                                                                                                    |                                                                                                                                |
|-------------------------------------------------------------------------------------------------------------------------------------------------------------------------------------------------------------------------------------------------------------------------------------------------------------------|----------|----------------------------------------------------------------------------------------------------------------------------------------------------------------------------------------------------------------------------------------------------------------------------------------------------------------------------------------------------------------------------------------------------|--------------------------------------------------------------------------------------------------------------------------------|
| <i>ENSSSCG00000009874 (RASAL1), ENSSSCG00000009875 (CFAP73),<br/> ENSSSCG00000009876 (DDX54), ENSSSCG00000009879 (TPCN1),<br/> ENSSSCG00000034479 (RITA1), ENSSSCG00000009877 (IQCD),<br/> ENSSSCG00000009880 (SLC8B1), ENSSSCG00000009881 (OAS2),<br/> ENSSSCG00000046640 (OAS1), ENSSSCG00000009883 (RPH3A)</i> |          |                                                                                                                                                                                                                                                                                                                                                                                                    |                                                                                                                                |
| SSC14:<br>96,986,147-<br>98,057,493                                                                                                                                                                                                                                                                               | 0.24(22) | <i>ENSSSCG00000010427, ENSSSCG00000010428,<br/> ENSSSCG00000050078, ENSSSCG00000010429 (PRKG1),<br/> ENSSSCG00000050287</i>                                                                                                                                                                                                                                                                        | Feed conversion ratio, average daily gain                                                                                      |
| SSC18:<br>40,268,397-<br>40,910,375                                                                                                                                                                                                                                                                               | 0.23(16) | <i>ENSSSCG00000024754 (BBS9), ENSSSCG00000042909,<br/> ENSSSCG00000038919 (RP9), ENSSSCG00000049414,<br/> ENSSSCG00000022912 (NT5C3A), ENSSSCG00000021250,<br/> ENSSSCG00000022464 (KBTBD2), ENSSSCG00000023445 (AVL9),<br/> ENSSSCG00000043449, ENSSSCG00000047223,<br/> ENSSSCG00000026064, ENSSSCG00000048227,<br/> ENSSSCG00000048859, ENSSSCG00000021095,<br/> ENSSSCG00000016668 (PDE1C)</i> | .                                                                                                                              |
| SSC3:<br>99,313,315-<br>100,285,031                                                                                                                                                                                                                                                                               | 0.22(21) | <i>ENSSSCG00000048362, ENSSSCG00000043111,<br/> ENSSSCG00000048793, ENSSSCG00000045020,<br/> ENSSSCG00000050296, ENSSSCG00000036418 (SLC8A1),<br/> ENSSSCG00000050402, ENSSSCG00000043827</i>                                                                                                                                                                                                      | CD3-negative, corpus luteum number,<br>feed conversion ratio, backfat between<br>3 <sup>rd</sup> and 4 <sup>th</sup> last ribs |
| SSC13:<br>14,054,487-<br>14,296,693                                                                                                                                                                                                                                                                               | 0.22(13) | <i>ENSSSCG00000046221, ENSSSCG00000049580,<br/> ENSSSCG00000040057 (EOMES), ENSSSCG00000041500</i>                                                                                                                                                                                                                                                                                                 | .                                                                                                                              |
| SSC3:<br>36,562,403-<br>37,226,080                                                                                                                                                                                                                                                                                | 0.21(12) | <i>ENSSSCG00000007917 (RBFOX1)</i>                                                                                                                                                                                                                                                                                                                                                                 | CD8-negative leukocyte percentage,<br>CD8-positive leukocyte percentage,<br>maternal infanticide                               |
| SSC10:<br>46,555,218-<br>47,088,725                                                                                                                                                                                                                                                                               | 0.20(14) | <i>ENSSSCG00000011047 (FAM171A1), ENSSSCG00000026499 (NMT2),<br/> ENSSSCG00000032014, ENSSSCG00000027110 (RPP38),<br/> ENSSSCG00000045562, ENSSSCG00000038184 (ACBD7),<br/> ENSSSCG00000025759, ENSSSCG00000034119,<br/> ENSSSCG00000011049 (DCLRE1C), ENSSSCG00000011048<br/> (SUV39H2), ENSSSCG00000011051 (HSPA14), ENSSSCG00000039658</i>                                                      | Mean platelet volume, skatole, functional<br>teat number                                                                       |

|                                       |          |                                                                                                                                                                                                                                                                                                                                                                                                                                                                                                                                                                            |                                                                                                                                                                                                                                                       |
|---------------------------------------|----------|----------------------------------------------------------------------------------------------------------------------------------------------------------------------------------------------------------------------------------------------------------------------------------------------------------------------------------------------------------------------------------------------------------------------------------------------------------------------------------------------------------------------------------------------------------------------------|-------------------------------------------------------------------------------------------------------------------------------------------------------------------------------------------------------------------------------------------------------|
| SSC14:<br>144,236,610-<br>144,483,865 | 0.20(14) | .                                                                                                                                                                                                                                                                                                                                                                                                                                                                                                                                                                          | Coping behavior                                                                                                                                                                                                                                       |
| SSC14:<br>136,565,684-<br>136,939,847 | 0.20(13) | <i>ENSSSCG00000035045 (DOCK1), ENSSSCG00000010751 (NPS)</i>                                                                                                                                                                                                                                                                                                                                                                                                                                                                                                                | Total number of piglets born alive, litter size, intramuscular fat content                                                                                                                                                                            |
| SSC1:<br>208,516,673-<br>209,787,256  | 0.19(12) | <i>ENSSSCG00000051701, ENSSSCG00000005191 (MPDZ),<br/>ENSSSCG00000051645, ENSSSCG00000034928,<br/>ENSSSCG00000036360 (LURAP1L), ENSSSCG00000005193 (TYRP1)</i>                                                                                                                                                                                                                                                                                                                                                                                                             | .                                                                                                                                                                                                                                                     |
| SSC18:<br>45,539,953-<br>45,766,672   | 0.19(11) | <i>ENSSSCG00000016708 (SKAP2), ENSSSCG00000041996</i>                                                                                                                                                                                                                                                                                                                                                                                                                                                                                                                      | Red blood cell count                                                                                                                                                                                                                                  |
| SSC5:<br>5,515,322-<br>5,693,454      | 0.18(12) | <i>ENSSSCG00000051106, ENSSSCG00000000029 (SCUBE1)</i>                                                                                                                                                                                                                                                                                                                                                                                                                                                                                                                     | Hind feet conformation                                                                                                                                                                                                                                |
| SSC11:<br>17,102,723-<br>17,987,136   | 0.18(10) | <i>ENSSSCG00000049891, ENSSSCG00000049814,<br/>ENSSSCG00000045895, ENSSSCG00000048645,<br/>ENSSSCG00000049693, ENSSSCG00000049008,<br/>ENSSSCG00000041668, ENSSSCG00000046542,<br/>ENSSSCG00000051275, ENSSSCG00000048598,<br/>ENSSSCG00000049854, ENSSSCG00000051290,<br/>ENSSSCG00000046277, ENSSSCG00000051086,<br/>ENSSSCG00000041698, ENSSSCG00000019092,<br/>ENSSSCG00000019808, ENSSSCG00000041341,<br/>ENSSSCG00000046352, ENSSSCG00000045213,<br/>ENSSSCG00000009388 (KCNRG), ENSSSCG00000009389 (TRIM13),<br/>ENSSSCG00000009390, ENSSSCG00000024125 (KPNA3)</i> | .                                                                                                                                                                                                                                                     |
| SSC14:<br>121,766,701-<br>123,117,472 | 0.18(14) | <i>ENSSSCG00000042781, ENSSSCG00000041222,<br/>ENSSSCG00000046091, ENSSSCG00000050661,<br/>ENSSSCG00000010631 (GPAM), ENSSSCG00000010632 (TECTB),<br/>ENSSSCG00000050321, ENSSSCG00000031789 (ACSL5),<br/>ENSSSCG00000010635 (ZDHHC6), ENSSSCG00000032968 (VTI1A)</i>                                                                                                                                                                                                                                                                                                      | Monounsaturated fatty acid content,<br>Stearic acid content, Oleic acid content,<br>Saturated fatty acid content, Palmitic acid<br>content, Palmitoleic acid content, Oleic<br>acid to stearic acid ratio,<br>Monounsaturated fatty acid to saturated |

|                                      |          |                                                                                                                                                                                                                                                                                                                         |                                                                                                                                                                                                                                                                                                                                                                                        |
|--------------------------------------|----------|-------------------------------------------------------------------------------------------------------------------------------------------------------------------------------------------------------------------------------------------------------------------------------------------------------------------------|----------------------------------------------------------------------------------------------------------------------------------------------------------------------------------------------------------------------------------------------------------------------------------------------------------------------------------------------------------------------------------------|
|                                      |          |                                                                                                                                                                                                                                                                                                                         | fatty acid ratio, unsaturated to saturated fatty acid ratio, Palmitoleic acid to palmitic acid ratio, Stearic acid to palmitic acid ratio, pH 24 hour post-mortem (loin), feed conversion ratio, fatty acid atherogenic index, fatty acid thrombogenic index, double-bond index, unsaturated index, thoracic vertebra number, thoracolumbar vertebra number, average backfat thickness |
| SSC3:<br>65,784,424-<br>66,506,595   | 0.18(16) | <i>ENSSSCG00000042171, ENSSSCG00000008259 (LRRTM4)</i>                                                                                                                                                                                                                                                                  | CD3-negative, CD8-negative leukocyte percentage, CD8-positive leukocyte percentage                                                                                                                                                                                                                                                                                                     |
| SSC7:<br>129,582,907-<br>130,165,353 | 0.17(13) | .                                                                                                                                                                                                                                                                                                                       | .                                                                                                                                                                                                                                                                                                                                                                                      |
| SSC18:<br>35,731,229-<br>36,469,920  | 0.16(17) | <i>ENSSSCG00000042796, ENSSSCG00000041482, ENSSSCG00000044944, ENSSSCG00000043837, ENSSSCG00000048016, ENSSSCG00000049426, ENSSSCG00000034626</i>                                                                                                                                                                       | .                                                                                                                                                                                                                                                                                                                                                                                      |
| SSC8:<br>49,111,962-<br>50,537,893   | 0.15(10) | <i>ENSSSCG00000020037, ENSSSCG00000027183 (FSTL5)</i>                                                                                                                                                                                                                                                                   | Teat number                                                                                                                                                                                                                                                                                                                                                                            |
| SSC12:<br>21,590,780-<br>21,790,209  | 0.15(10) | <i>ENSSSCG00000017459 (KRT20), ENSSSCG00000017460 (KRT12), ENSSSCG00000028522 (KRT10), ENSSSCG00000017461 (KRT28), ENSSSCG00000017462, ENSSSCG00000043259, ENSSSCG00000017463 (KRT26), ENSSSCG00000017464 (KRT25), ENSSSCG00000017465 (KRT24), ENSSSCG00000034208, ENSSSCG00000036089, ENSSSCG00000039137 (SMARCE1)</i> | .                                                                                                                                                                                                                                                                                                                                                                                      |
| SSC9:<br>141,951,516-<br>142,198,779 | 0.15(12) | .                                                                                                                                                                                                                                                                                                                       | .                                                                                                                                                                                                                                                                                                                                                                                      |

|                                       |          |                                                                                                                                       |                                                                                                                                                                                                                                                                                                                                                                                                                                               |
|---------------------------------------|----------|---------------------------------------------------------------------------------------------------------------------------------------|-----------------------------------------------------------------------------------------------------------------------------------------------------------------------------------------------------------------------------------------------------------------------------------------------------------------------------------------------------------------------------------------------------------------------------------------------|
| SSC6:<br>126,692,828-<br>127,194,692  | 0.15(11) | .                                                                                                                                     | Backfat at 10 <sup>th</sup> rib, LDL cholesterol,<br>basophil percentage, intramuscular fat<br>content                                                                                                                                                                                                                                                                                                                                        |
| SSC14:<br>118,988,272-<br>119,983,210 | 0.15(12) | <i>ENSSSCG00000045123, ENSSSCG00000050155,<br/>ENSSSCG00000046631, ENSSSCG00000050431,<br/>ENSSSCG00000047504, ENSSSCG00000006978</i> | Stearic acid content, Palmitic acid<br>content, Saturated fatty acid content,<br>Monounsaturated fatty acid content,<br>Palmitoleic acid content, Oleic acid<br>content, thoracolumbar vertebra number,<br>Oleic acid to stearic acid ratio,<br>Monounsaturated fatty acid to saturated<br>fatty acid ratio, Unsaturated to saturated<br>fatty acid ratio, Palmitoleic acid to<br>palmitic acid ratio, Stearic acid to<br>palmitic acid ratio |
| SSC2:<br>139,272,108-<br>139,653,453  | 0.14(11) | <i>ENSSSCG00000032423 (SPOCK1), ENSSSCG00000014321 (KLHL3)</i>                                                                        | Intramuscular fat content                                                                                                                                                                                                                                                                                                                                                                                                                     |
| SSC2:<br>136,398,371-<br>136,554,308  | 0.14(10) | <i>ENSSSCG00000014296 (VDAC1), ENSSSCG00000030680 (TCF7),<br/>ENSSSCG00000038628 (SKP1), ENSSSCG00000014298</i>                       | .                                                                                                                                                                                                                                                                                                                                                                                                                                             |
| SSC3:<br>62,800,988-<br>63,130,898    | 0.14(10) | .                                                                                                                                     | CD3-negative, CD8-negative leukocyte<br>percentage, CD8-positive leukocyte<br>percentage                                                                                                                                                                                                                                                                                                                                                      |
| SSC17:<br>6,521,746-<br>6,946,270     | 0.14(10) | <i>ENSSSCG00000048723</i>                                                                                                             | .                                                                                                                                                                                                                                                                                                                                                                                                                                             |
| SSC7:<br>10,695,721-<br>10,903,372    | 0.13(10) | <i>ENSSSCG00000045903, ENSSSCG00000039116,<br/>ENSSSCG00000044834</i>                                                                 | Triglyceride level                                                                                                                                                                                                                                                                                                                                                                                                                            |

**Location:** indicates the chromosome number (SSC1 to SSC18), followed by the starting and end position of the genomic window(s) in base pairs; **Var(%)**: the percental variance explained by the most relevant 10-SNP window within the region of interest; **N SNP**: number of SNP marker included in the genomic region identified; **Positional genes**: Ensembl gene stable ID (with official gene symbol when known) mapped to the genomic regions

identified; **QTL traits**: indicates which traits have known QTLs mapped within the genomic region of interest, based on QTLs reported in the Pig QTL database (<https://www.animalgenome.org/cgi-bin/QTLdb/SS/index>).
