# Supplementary material
Source: publisher figshare collection journal article supplement (https://frontiersin.figshare.com/ndownloader/files/23547128)
Supplement: Supplementary file 26 [file 23547128]

**Table S2a:** Significant genomic windows for the intercept term of the reaction norm on total number of piglets born (TNB) as regressed on the Average Relative Humidity 14 to 7 days before conception in the Smithfield Premium Genetics (SPG) Landrace population (SPG LR).

| Location                              | Var(%) and<br>N SNPs in<br>brackets | Positional genes                                                                                                                                                                                                                                                                                                                                                                                                             | QTL traits                                                                                                                                              |
|---------------------------------------|-------------------------------------|------------------------------------------------------------------------------------------------------------------------------------------------------------------------------------------------------------------------------------------------------------------------------------------------------------------------------------------------------------------------------------------------------------------------------|---------------------------------------------------------------------------------------------------------------------------------------------------------|
| SSC2:<br>133,626,412-<br>134,446,288  | 0.36(28)                            | <i>ENSSSCG00000033213 (LYRM7), ENSSSCG00000036686 (CDC42SE2),<br/>ENSSSCG00000014267, ENSSSCG00000014269 (FNIP1),<br/>ENSSSCG00000020274, ENSSSCG00000014271 (MEIKIN),<br/>ENSSSCG00000014272, ENSSSCG00000023737, ENSSSCG00000036626</i>                                                                                                                                                                                    | .                                                                                                                                                       |
| SSC2:<br>157,492,614-<br>158,466,521  | 0.34(29)                            | .                                                                                                                                                                                                                                                                                                                                                                                                                            | Spinal curvature, average daily gain,<br>pH 24 hours <i>post-mortem</i> (loin and<br>ham), conductivity 24 hours <i>post-<br/>mortem</i> , flavor score |
| SSC16:<br>47,916,509-<br>48,994,238   | 0.32(21)                            | <i>ENSSSCG00000016971 (MCCC2), ENSSSCG00000047824,<br/>ENSSSCG00000016972, ENSSSCG00000022219, ENSSSCG00000016974<br/>(MAP1B), ENSSSCG00000023818 (MRPS27), ENSSSCG00000046085,<br/>ENSSSCG00000016975 (PTCD2), ENSSSCG00000039883,<br/>ENSSSCG00000048660, ENSSSCG00000044917, ENSSSCG00000046046,<br/>ENSSSCG00000016976 (ZNF366), ENSSSCG00000047095,<br/>ENSSSCG00000048350</i>                                          | Arachidic acid to stearic acid ratio,<br>Eicosenoic acid to eicosanoic acid<br>ratio, average backfat thickness                                         |
| SSC17:<br>48,537,476-<br>49,274,453   | 0.31(18)                            | <i>ENSSSCG00000023306 (ELMO2), ENSSSCG00000051122,<br/>ENSSSCG00000042586, ENSSSCG00000041922, ENSSSCG00000051117,<br/>ENSSSCG00000032191, ENSSSCG00000007448 (OCSTAMP),<br/>ENSSSCG00000035906 (SLC13A3), ENSSSCG00000007452 (TP53RK),<br/>ENSSSCG00000007451 (SLC2A10), ENSSSCG00000041724,<br/>ENSSSCG00000033678, ENSSSCG00000039038, ENSSSCG00000007453<br/>(EYA2), ENSSSCG00000039785, ENSSSCG00000007454 (ZMYND8)</i> | Gestation length, hind leg<br>conformation                                                                                                              |
| SSC15:<br>143,339,720-<br>143,835,976 | 0.30(17)                            | .                                                                                                                                                                                                                                                                                                                                                                                                                            | .                                                                                                                                                       |

|                                     |          |                                                                                                                                                                                                                                                                                                                                                                                                                                                                                                                                                                                                                                                                                                                                                                                                                                                                                                                                                                  |                                                                                                                                                                                        |
|-------------------------------------|----------|------------------------------------------------------------------------------------------------------------------------------------------------------------------------------------------------------------------------------------------------------------------------------------------------------------------------------------------------------------------------------------------------------------------------------------------------------------------------------------------------------------------------------------------------------------------------------------------------------------------------------------------------------------------------------------------------------------------------------------------------------------------------------------------------------------------------------------------------------------------------------------------------------------------------------------------------------------------|----------------------------------------------------------------------------------------------------------------------------------------------------------------------------------------|
| SSC10:<br>31,882,839-<br>32,846,771 | 0.29(17) | <i>ENSSSCG00000040707, ENSSSCG00000038162, ENSSSCG00000038502,<br/> ENSSSCG00000010966, ENSSSCG00000034888, ENSSSCG00000010968,<br/> ENSSSCG00000010967, ENSSSCG00000010969 (GALT),<br/> ENSSSCG00000037000 (SIGMAR1), ENSSSCG00000010971 (ARID3C),<br/> ENSSSCG00000010972 (DCTN3), ENSSSCG00000010973 (RPP25L),<br/> ENSSSCG00000010974 (CNTFR), ENSSSCG00000027428,<br/> ENSSSCG00000039342 (DNAIL), ENSSSCG00000033196 (MYORG),<br/> ENSSSCG00000035455 (FAM219A), ENSSSCG00000010980 (C9orf24),<br/> ENSSSCG00000010981 (NUDT2), ENSSSCG00000010984 (KIF24),<br/> ENSSSCG00000021761 (UBAP1), ENSSSCG00000024384 (DCAF12),<br/> ENSSSCG00000010987 (UBAP2), ENSSSCG00000049962</i>                                                                                                                                                                                                                                                                          | Heart weight, mean corpuscular<br>volume, total number of piglets born<br>alive                                                                                                        |
| SSC1:<br>12,797,159-<br>13,478,197  | 0.29(25) | <i>ENSSSCG00000041027, ENSSSCG00000050641, ENSSSCG00000004075<br/> (RGS17), ENSSSCG00000004076(MTRF1L), ENSSSCG00000004077<br/> (FBXO5)</i>                                                                                                                                                                                                                                                                                                                                                                                                                                                                                                                                                                                                                                                                                                                                                                                                                      | Drip loss                                                                                                                                                                              |
| SSC9:<br>15,049,063-<br>15,566,499  | 0.28(19) | <i>ENSSSCG00000045934, ENSSSCG00000034240, ENSSSCG00000043081,<br/> ENSSSCG00000047651, ENSSSCG00000047633, ENSSSCG00000048266</i>                                                                                                                                                                                                                                                                                                                                                                                                                                                                                                                                                                                                                                                                                                                                                                                                                               | Intramuscular fat content                                                                                                                                                              |
| SSC2:<br>73,651,236-<br>76,656,637  | 0.26(22) | <i>ENSSSCG00000028612 (PTPRS), ENSSSCG00000024570 (KDM4B),<br/> ENSSSCG00000013517 (UHRF1), ENSSSCG00000037183 (ARRDC5),<br/> ENSSSCG00000044528, ENSSSCG00000038954 (PLIN3),<br/> ENSSSCG00000024771 (TICAM1), ENSSSCG00000044427,<br/> ENSSSCG00000037153 (FEM1A), ENSSSCG00000046891,<br/> ENSSSCG00000045032, ENSSSCG00000026063 (DPP9),<br/> ENSSSCG00000034898 (MYDGF), ENSSSCG00000034615 (TNFAIP8L1),<br/> ENSSSCG00000035176 (SEMA6B), ENSSSCG00000013513 (PLIN5),<br/> ENSSSCG00000013512 (PLIN4), ENSSSCG00000013511 (HDGFL2),<br/> ENSSSCG00000013510 (UBXN6), ENSSSCG00000013509 (CHAF1A),<br/> ENSSSCG00000013508 (SH3GL1), ENSSSCG00000013507 (MPND),<br/> ENSSSCG00000013506 (STAP2), ENSSSCG00000013505 (FSD1),<br/> ENSSSCG00000013504, ENSSSCG00000013503 (SHD),<br/> ENSSSCG00000013499 (YJU2), ENSSSCG00000013498 (EBI3),<br/> ENSSSCG00000013497 (ANKRD24), ENSSSCG00000013496,<br/> ENSSSCG00000013501 (CREB3L3), ENSSSCG00000027127,</i> | Mean corpuscular volume, spinal<br>curvature, number of mummified<br>piglets, pH 24 hours <i>post-mortem</i><br>(loin), marbling, thawing loss, mean<br>corpuscular hemoglobin content |

ENSSSCG00000044761, ENSSSCG00000029236 (ZBTB7A),  
ENSSSCG00000022066 (PIAS4), ENSSSCG00000050591,  
ENSSSCG00000026884, ENSSSCG00000025675 (EEF2),  
ENSSSCG00000029719 (SNORD37), ENSSSCG00000032170 (DAPK3),  
ENSSSCG00000040860 (NMRK2), ENSSSCG00000026754 (ATCAY),  
ENSSSCG00000013495 (ZFR2), ENSSSCG00000013494 (MATK),  
ENSSSCG00000032429 (RAX2), ENSSSCG00000024242 (MRPL54),  
ENSSSCG00000013492 (APBA3), ENSSSCG00000013491 (TJP3),  
ENSSSCG00000013490 (PIP5K1C), ENSSSCG00000050486,  
ENSSSCG00000032085 (CACTIN), ENSSSCG00000033759 (TBXA2R),  
ENSSSCG00000036190 (GIPC3), ENSSSCG00000048374,  
ENSSSCG00000040421 (HMG20B), ENSSSCG00000026169 (MFSD12),  
ENSSSCG00000013481 (FZR1), ENSSSCG00000044884 (C19orf71),  
ENSSSCG00000013478 (DOHH), ENSSSCG00000049629,  
ENSSSCG00000038067, ENSSSCG00000036537 (NFIC),  
ENSSSCG00000013476 (CELF5), ENSSSCG00000013475 (NCLN),  
ENSSSCG00000013474 (SIPR4), ENSSSCG00000013473 (GNA15),  
ENSSSCG00000029279, ENSSSCG00000022205, ENSSSCG00000032265  
(TLE5), ENSSSCG00000028995 (TLE2), ENSSSCG00000024588,  
ENSSSCG00000041800, ENSSSCG00000036792, ENSSSCG00000038030,  
ENSSSCG00000034545, ENSSSCG00000013471, ENSSSCG00000039774,  
ENSSSCG00000013469 (ZNF555), ENSSSCG00000013468,  
ENSSSCG00000038635 (ZNF554), ENSSSCG00000013467 (SGTA),  
ENSSSCG00000038013 (DIRA1), ENSSSCG00000033949,  
ENSSSCG00000049505, ENSSSCG00000043780, ENSSSCG00000022689  
(GADD45B), ENSSSCG00000026784 (LMNB2), ENSSSCG00000022757,  
ENSSSCG00000044920, ENSSSCG00000028363 (TMPRSS9),  
ENSSSCG00000013464 (SPPL2B), ENSSSCG00000013463 (LSM7),  
ENSSSCG00000013462 (LINGO3), ENSSSCG00000013461 (PEAK3),  
ENSSSCG00000013460, ENSSSCG00000013457 (DOT1L),  
ENSSSCG00000013453, ENSSSCG00000035812 (AMH),  
ENSSSCG00000031899 (JSRP1), ENSSSCG00000040157 (AP3D1),  
ENSSSCG00000013455 (IZUMO4), ENSSSCG00000032366 (MOB3A),

|                                       |          |                                                                                                                                                                                                                                                                                                                                                                                                                                                                                                  |                                                                      |
|---------------------------------------|----------|--------------------------------------------------------------------------------------------------------------------------------------------------------------------------------------------------------------------------------------------------------------------------------------------------------------------------------------------------------------------------------------------------------------------------------------------------------------------------------------------------|----------------------------------------------------------------------|
|                                       |          | <i>ENSSSCG00000013448 (MKNK2), ENSSSCG00000013444 (BTBD2),<br/> ENSSSCG00000042835, ENSSSCG00000013445 (CSNK1G2),<br/> ENSSSCG00000013446 (SCAMP4), ENSSSCG00000038810 (ADAT3),<br/> ENSSSCG00000025631, ENSSSCG00000013442 (ABHD17A)</i>                                                                                                                                                                                                                                                        |                                                                      |
| SSC4:<br>35,675,562-<br>36,727,180    | 0.26(18) | <i>ENSSSCG00000045985, ENSSSCG00000006061, ENSSSCG00000046299,<br/> ENSSSCG00000006062 (YWHAZ), ENSSSCG00000006063 (PABPC1),<br/> ENSSSCG00000006064 (SNX31), ENSSSCG00000006065 (ANKRD46),<br/> ENSSSCG00000041192, ENSSSCG00000044093, ENSSSCG00000006066<br/> (RNF19A)</i>                                                                                                                                                                                                                    | Drip loss, Oleic acid content,<br>monounsaturated fatty acid content |
| SSC10:<br>30,140,466-<br>31,750,116   | 0.26(32) | <i>ENSSSCG00000010959 (NTRK2), ENSSSCG00000043924,<br/> ENSSSCG00000023147, ENSSSCG00000042859, ENSSSCG00000041561,<br/> ENSSSCG00000010960 (SLC28A3), ENSSSCG00000041849,<br/> ENSSSCG00000039950 (RMI1), ENSSSCG00000022760,<br/> ENSSSCG00000028046, ENSSSCG00000034203 (C9orf64),<br/> ENSSSCG00000021571 (KIF27), ENSSSCG00000026087 (GKAP1),<br/> ENSSSCG00000049051, ENSSSCG00000021005 (UBQLN1),<br/> ENSSSCG00000035132 (IDNK), ENSSSCG00000010962 (FRMD3),<br/> ENSSSCG00000035626</i> | .                                                                    |
| SSC14:<br>570,328-<br>980,734         | 0.25(15) | <i>ENSSSCG00000009580 (SIPR3), ENSSSCG00000039841 (SHC3),<br/> ENSSSCG00000021161 (CKS2), ENSSSCG00000028033 (SECISBP2),<br/> ENSSSCG00000009584 (SEMA4D)</i>                                                                                                                                                                                                                                                                                                                                    | .                                                                    |
| SSC6:<br>148,609,748-<br>149,229,369  | 0.25(15) | <i>ENSSSCG00000003811 (ROR1), ENSSSCG00000049707,<br/> ENSSSCG00000003812 (PGM1), ENSSSCG00000003814 (EFCAB7),<br/> ENSSSCG00000037421, ENSSSCG00000020427, ENSSSCG00000042211,<br/> ENSSSCG00000003815 (ALG6), ENSSSCG00000050660,<br/> ENSSSCG00000032215 (FOXD3), ENSSSCG00000049788,<br/> ENSSSCG00000051600</i>                                                                                                                                                                             | Backfat between 3 <sup>rd</sup> and 4 <sup>th</sup> last ribs        |
| SSC15:<br>141,355,395-<br>141,896,354 | 0.24(23) | .                                                                                                                                                                                                                                                                                                                                                                                                                                                                                                | Immunocrit                                                           |
| SSC10:<br>68,582,444-<br>69,051,399   | 0.23(18) | <i>ENSSSCG00000011162, ENSSSCG00000042778, ENSSSCG00000011163<br/> (DIP2C), ENSSSCG00000045476</i>                                                                                                                                                                                                                                                                                                                                                                                               | .                                                                    |

|                                       |          |                                                                                                                                                                                                                                                                                                                                                                                                             |                                                                                                                                                                                                         |
|---------------------------------------|----------|-------------------------------------------------------------------------------------------------------------------------------------------------------------------------------------------------------------------------------------------------------------------------------------------------------------------------------------------------------------------------------------------------------------|---------------------------------------------------------------------------------------------------------------------------------------------------------------------------------------------------------|
| SSC7:<br>44,026,616-<br>44,974,706    | 0.23(19) | <i>ENSSSCG00000001743, ENSSSCG00000036460, ENSSSCG00000001744 (TFAP2D), ENSSSCG00000025535 (TFAP2B), ENSSSCG00000047825, ENSSSCG00000043682</i>                                                                                                                                                                                                                                                             | Gait score (hind), age at puberty, liver weight, heart weight, head weight, kidney weight, cervical vertebra length, carcass length, carcass weight, meat color L*, adipocyte area, adipocyte perimeter |
| SSC15:<br>142,546,880-<br>142,937,514 | 0.23(19) | .                                                                                                                                                                                                                                                                                                                                                                                                           | .                                                                                                                                                                                                       |
| SSC5:<br>95,199,760-<br>96,141,923    | 0.23(18) | <i>ENSSSCG00000044094, ENSSSCG00000045522, ENSSSCG00000050070, ENSSSCG00000051589, ENSSSCG00000051123, ENSSSCG00000042886, ENSSSCG00000048690, ENSSSCG00000043585, ENSSSCG00000051236, ENSSSCG00000043326, ENSSSCG00000042993, ENSSSCG00000048758</i>                                                                                                                                                       | Platelet count                                                                                                                                                                                          |
| SSC18:<br>58,699,852-<br>59,164,560   | 0.23(16) | .                                                                                                                                                                                                                                                                                                                                                                                                           | Litter size, Feed conversion ratio                                                                                                                                                                      |
| SSC5:<br>12,819,065-<br>14,161,325    | 0.23(27) | <i>ENSSSCG00000000162 (BTBD11), ENSSSCG00000036971, ENSSSCG00000048045, ENSSSCG00000000164 (CRY1), ENSSSCG00000039109 (MTERF2), ENSSSCG00000038968 (TMEM263), ENSSSCG00000000167 (RIC8B), ENSSSCG00000000169 (POLR3B), ENSSSCG00000024881 (TCP11L2), ENSSSCG00000045300, ENSSSCG00000000171, ENSSSCG00000045128, ENSSSCG00000041235, ENSSSCG00000047442, ENSSSCG00000043586, ENSSSCG00000032861 (NUAK1)</i> | White blood cell number, carcass length, total number of piglets born alive, small intestine length                                                                                                     |
| SSC2:<br>131,124,958-<br>131,778,505  | 0.22(15) | <i>ENSSSCG000000014256 (FBN2), ENSSSCG00000041980, ENSSSCG000000014257 (SLC27A6)</i>                                                                                                                                                                                                                                                                                                                        | .                                                                                                                                                                                                       |
| SSC18:<br>60,471,276-<br>61,093,438   | 0.21(18) | .                                                                                                                                                                                                                                                                                                                                                                                                           | Testicular length, age at puberty                                                                                                                                                                       |
| SSC13:<br>114,884,492-<br>116,369,233 | 0.21(14) | <i>ENSSSCG00000043568, ENSSSCG00000019249, ENSSSCG00000011760 (TBL1XR1), ENSSSCG00000036414, ENSSSCG00000041368, ENSSSCG00000041195, ENSSSCG00000046692, ENSSSCG00000049497,</i>                                                                                                                                                                                                                            | Backfat between 3 <sup>rd</sup> and 4 <sup>th</sup> last ribs, melanoma susceptibility                                                                                                                  |

|                                       |          |                                                                                                                                                                                                                                                                                                                                                                                                                                                                                                                                            |                                                                                                                                |
|---------------------------------------|----------|--------------------------------------------------------------------------------------------------------------------------------------------------------------------------------------------------------------------------------------------------------------------------------------------------------------------------------------------------------------------------------------------------------------------------------------------------------------------------------------------------------------------------------------------|--------------------------------------------------------------------------------------------------------------------------------|
|                                       |          | ENSSSCG00000050167, ENSSSCG00000047445, ENSSSCG00000044965,<br>ENSSSCG00000048906, ENSSSCG00000049288, ENSSSCG00000042021,<br>ENSSSCG00000051451, ENSSSCG00000020389                                                                                                                                                                                                                                                                                                                                                                       |                                                                                                                                |
| SSC15:<br>131,823,405-<br>132,590,789 | 0.21(23) | ENSSSCG00000016272 (PSMD1), ENSSSCG00000016273 (HTR2B),<br>ENSSSCG00000019320, ENSSSCG00000023994 (ARMC9),<br>ENSSSCG00000033015 (B3GNT7), ENSSSCG00000016275 (NCL),<br>ENSSSCG00000019707, ENSSSCG00000018293 (SNORD20),<br>ENSSSCG00000027560, ENSSSCG00000016277 (NMUR1),<br>ENSSSCG00000016278, ENSSSCG00000041092, ENSSSCG00000050388,<br>ENSSSCG00000037274 (PTMA), ENSSSCG00000016279 (PDE6D),<br>ENSSSCG00000033334 (COPS7B), ENSSSCG00000026852 (NPPC),<br>ENSSSCG00000049901, ENSSSCG00000022177 (DIS3L2),<br>ENSSSCG00000045363 | Splay leg, pH 24 hours <i>post-mortem</i><br>(loin), total number of piglets born<br>alive                                     |
| SSC3:<br>121,715,613-<br>122,235,888  | 0.21(15) | ENSSSCG00000042394, ENSSSCG00000008619 (DDX1),<br>ENSSSCG00000008621 (NBAS), ENSSSCG00000045349                                                                                                                                                                                                                                                                                                                                                                                                                                            | LDL cholesterol, cholesterol level                                                                                             |
| SSC3:<br>49,578,962-<br>50,726,908    | 0.20(14) | ENSSSCG00000025772 (GPR45), ENSSSCG00000028020 (MRPS9),<br>ENSSSCG00000050003, ENSSSCG00000022096 (POU3F3),<br>ENSSSCG00000042134, ENSSSCG00000045191, ENSSSCG00000041960,<br>ENSSSCG00000042443, ENSSSCG00000036710                                                                                                                                                                                                                                                                                                                       | CD8-negative leukocyte percentage,<br>CD8-positive leukocyte percentage,<br>lactate level, body temperature,<br>platelet count |
| SSC6:<br>14,620,144-<br>15,144,746    | 0.20(20) | ENSSSCG00000002734, ENSSSCG00000002739 (PHLPP2),<br>ENSSSCG00000002740 (APIG1), ENSSSCG00000019395 (SNORD71),<br>ENSSSCG00000035474, ENSSSCG00000038917 (ATXN1L),<br>ENSSSCG00000002743 (IST1), ENSSSCG00000002741 (ZNF821),<br>ENSSSCG00000002746 (DHODH), ENSSSCG00000002749,<br>ENSSSCG00000050689, ENSSSCG00000025218 (TXNL4B),<br>ENSSSCG00000002748 (DHX38), ENSSSCG00000002747 (PMFBP1)                                                                                                                                             | Unsaturated fatty acid content                                                                                                 |
| SSC1:<br>242,598-<br>947,141          | 0.20(10) | ENSSSCG00000043002, ENSSSCG00000050193, ENSSSCG00000046031,<br>ENSSSCG00000042397, ENSSSCG00000035944, ENSSSCG00000047845,<br>ENSSSCG00000004010 (ERMARD), ENSSSCG00000004009 (TCTE3),<br>ENSSSCG00000030155 (PHF10), ENSSSCG00000038931 (C6orf120),<br>ENSSSCG00000004008, ENSSSCG00000045488, ENSSSCG00000048735,                                                                                                                                                                                                                        | Arachidonic acid to dihomo-gamma-<br>linolenic acid ratio, arachidonic acid<br>to eicosadienoic acid ratio, backfat at<br>rump |

|                                      |          |                                                                                                                                                                                                                                                                                                                                                                                                                                    |                                                                                                                                                                                                                                                  |
|--------------------------------------|----------|------------------------------------------------------------------------------------------------------------------------------------------------------------------------------------------------------------------------------------------------------------------------------------------------------------------------------------------------------------------------------------------------------------------------------------|--------------------------------------------------------------------------------------------------------------------------------------------------------------------------------------------------------------------------------------------------|
|                                      |          | <i>ENSSSCG00000049501, ENSSSCG0000004012 (THBS2),<br/>ENSSSCG00000035661</i>                                                                                                                                                                                                                                                                                                                                                       |                                                                                                                                                                                                                                                  |
| SSC3:<br>126,974,179-<br>127,967,288 | 0.20(17) | <i>ENSSSCG00000008642 (ASAP2), ENSSSCG00000047198,<br/>ENSSSCG00000045751, ENSSSCG00000023539 (MBOAT2),<br/>ENSSSCG00000008644 (KIDINS220), ENSSSCG00000008645,<br/>ENSSSCG00000048192, ENSSSCG00000045283, ENSSSCG00000049370,<br/>ENSSSCG00000043395, ENSSSCG00000045206, ENSSSCG00000049451,<br/>ENSSSCG00000050833, ENSSSCG00000043816, ENSSSCG00000041417,<br/>ENSSSCG00000045752, ENSSSCG00000045758, ENSSSCG00000031948</i> | Glucose level, body weight (birth),<br>LDL cholesterol, cholesterol level,<br>age at puberty                                                                                                                                                     |
| SSC15:<br>35,281,500-<br>35,588,121  | 0.19(15) | <i>ENSSSCG00000049782, ENSSSCG00000046047, ENSSSCG00000049477,<br/>ENSSSCG00000046454, ENSSSCG00000044121</i>                                                                                                                                                                                                                                                                                                                      | .                                                                                                                                                                                                                                                |
| SSC4:<br>78,946,182-<br>79,413,481   | 0.19(13) | <i>ENSSSCG00000034495 (SNTG1), ENSSSCG00000035744,<br/>ENSSSCG00000039568 (SNAI2), ENSSSCG00000051418,<br/>ENSSSCG00000025391, ENSSSCG00000032052, ENSSSCG00000048282,<br/>ENSSSCG00000032887 (EFCAB1), ENSSSCG00000046405</i>                                                                                                                                                                                                     | Backfat between 3 <sup>rd</sup> and 4 <sup>th</sup> last ribs,<br>hemoglobin                                                                                                                                                                     |
| SSC2:<br>156,302,473-<br>157,412,049 | 0.19(25) | .                                                                                                                                                                                                                                                                                                                                                                                                                                  | Body weight, age at puberty,<br>Arachidonic acid to dihomo-gamma-<br>linolenic acid ratio, Dihomo-gamma-<br>linolenic acid to linoleic acid ratio,<br>backfat at 10 <sup>th</sup> rib, backfat at last rib,<br>phosphate level, loin muscle area |
| SSC12:<br>46,377,660-<br>46,855,900  | 0.19(15) | <i>ENSSSCG00000017796 (BLMH), ENSSSCG00000017798 (TMIGD1),<br/>ENSSSCG00000018963, ENSSSCG00000017799 (CPD),<br/>ENSSSCG00000029262 (GOSR1), ENSSSCG00000017801,<br/>ENSSSCG00000017802 (BHLHA9), ENSSSCG00000046847,<br/>ENSSSCG00000017804 (ABR)</i>                                                                                                                                                                             | Arachidic acid content, cis-11-<br>Eicosenoic acid content,<br>intramuscular fat content, Linoleic<br>acid content, Polyunsaturated fatty<br>acid content, Omega-6 fatty acid<br>content                                                         |
| SSC1:<br>91,489,854-<br>92,478,641   | 0.19(17) | <i>ENSSSCG00000044069, ENSSSCG0000004485 (CD109),<br/>ENSSSCG00000050469, ENSSSCG0000004486 (SLC17A5),<br/>ENSSSCG0000004489 (EEF1A1), ENSSSCG00000037674,<br/>ENSSSCG0000004487 (MTO1)</i>                                                                                                                                                                                                                                        | Mean corpuscular hemoglobin<br>content                                                                                                                                                                                                           |

|                                       |          |                                                                                                                                                                                                                                                                                                                                                                                      |                                                                                                                                                     |
|---------------------------------------|----------|--------------------------------------------------------------------------------------------------------------------------------------------------------------------------------------------------------------------------------------------------------------------------------------------------------------------------------------------------------------------------------------|-----------------------------------------------------------------------------------------------------------------------------------------------------|
| SSC10:<br>50,418,539-<br>50,778,647   | 0.19(13) | <i>ENSSSCG00000028135 (PRTFDC1), ENSSSCG00000037690,<br/>ENSSSCG00000011074 (ARHGAP21), ENSSSCG00000011075<br/>(KIAA1217)</i>                                                                                                                                                                                                                                                        | .                                                                                                                                                   |
| SSC11:<br>20,388,606-<br>21,313,819   | 0.19(17) | <i>ENSSSCG00000043883, ENSSSCG00000047786, ENSSSCG00000051133,<br/>ENSSSCG00000037452 (HTR2A), ENSSSCG00000046304,<br/>ENSSSCG00000009407 (ESD), ENSSSCG00000045677,<br/>ENSSSCG00000009408 (LRCH1), ENSSSCG00000009410 (RUBCNL),<br/>ENSSSCG00000009411 (LRRC63), ENSSSCG00000009412 (LCPI),<br/>ENSSSCG00000034648, ENSSSCG00000009413 (CPB2),<br/>ENSSSCG00000009414 (ZC3H13)</i> | Front leg conformation, hind leg<br>conformation, gait score (overall)                                                                              |
| SSC18:<br>59,655,603-<br>60,133,742   | 0.19(15) | .                                                                                                                                                                                                                                                                                                                                                                                    | .                                                                                                                                                   |
| SSC10:<br>33,859,597-<br>34,781,511   | 0.19(12) | <i>ENSSSCG00000011003, ENSSSCG00000030408 (DDX58),<br/>ENSSSCG00000011004 (TOPORS), ENSSSCG00000023807 (ACO1),<br/>ENSSSCG00000043981, ENSSSCG00000039263, ENSSSCG00000046623,<br/>ENSSSCG00000051410, ENSSSCG00000044813, ENSSSCG00000051170</i>                                                                                                                                    | Cervical vertebra length, immunocrit                                                                                                                |
| SSC3:<br>14,772,381-<br>15,010,975    | 0.18(12) | <i>ENSSSCG00000007727, ENSSSCG00000049007</i>                                                                                                                                                                                                                                                                                                                                        | .                                                                                                                                                   |
| SSC7:<br>65,166,653-<br>66,796,849    | 0.18(17) | <i>ENSSSCG00000040912, ENSSSCG00000032041, ENSSSCG00000034590,<br/>ENSSSCG00000037026, ENSSSCG00000039278, ENSSSCG00000039726,<br/>ENSSSCG00000001960 (EAPP), ENSSSCG00000048543,<br/>ENSSSCG00000042840, ENSSSCG00000044687, ENSSSCG00000045122,<br/>ENSSSCG00000047592, ENSSSCG00000001963 (EGLN3),<br/>ENSSSCG00000036652, ENSSSCG00000001964 (NPAS3),<br/>ENSSSCG00000047905</i> | Dressing percentage, Obesity index,<br>age at puberty, Eicosadienoic acid<br>content, conductivity 45 minutes<br><i>post-mortem</i> , meat color L* |
| SSC13:<br>215,235,674-<br>215,787,385 | 0.18(12) | .                                                                                                                                                                                                                                                                                                                                                                                    | .                                                                                                                                                   |
| SSC4:<br>110,552,282-<br>111,203,912  | 0.18(12) | <i>ENSSSCG00000006824 (GNAI3), ENSSSCG00000006825 (GPR61),<br/>ENSSSCG00000034883 (AMIGO1), ENSSSCG00000006827 (CYB561D1),<br/>ENSSSCG00000006828 (ATXN7L2), ENSSSCG00000006829 (SYPL2),</i>                                                                                                                                                                                         | Hind leg conformation, intramuscular<br>fat content                                                                                                 |

*ENSSSCG00000006830 (PSMA5), ENSSSCG00000006831 (SORT1),  
 ENSSSCG000000050471, ENSSSCG00000006834 (MYBPHL),  
 ENSSSCG000000036975 (PSRC1), ENSSSCG000000034360 (CELSR2),  
 ENSSSCG00000006835 (SARS), ENSSSCG00000006836 (KIAA1324),  
 ENSSSCG000000033292 (Clorf194), ENSSSCG000000018682,  
 ENSSSCG000000037816 (TMEM167B), ENSSSCG000000020842,  
 ENSSSCG00000006840 (WDR47), ENSSSCG00000006841 (CLCC1),  
 ENSSSCG000000021440 (GPSM2), ENSSSCG00000006842*

|                                      |          |                                                                                                                                                                                                                          |                                                |
|--------------------------------------|----------|--------------------------------------------------------------------------------------------------------------------------------------------------------------------------------------------------------------------------|------------------------------------------------|
| SSC8:<br>89,842,164-<br>90,857,359   | 0.18(13) | <i>ENSSSCG000000051283, ENSSSCG000000050034</i>                                                                                                                                                                          | .                                              |
| SSC2:<br>160,085,066-<br>160,809,717 | 0.18(14) | .                                                                                                                                                                                                                        | .                                              |
| SSC17:<br>64,680,839-<br>64,982,346  | 0.18(14) | .                                                                                                                                                                                                                        | .                                              |
| SSC9:<br>28,523,192-<br>28,925,416   | 0.18(14) | .                                                                                                                                                                                                                        | Adrenal gland weight, hind leg<br>conformation |
| SSC3:<br>128,063,568-<br>128,395,347 | 0.17(13) | <i>ENSSSCG000000048889, ENSSSCG000000046300</i>                                                                                                                                                                          | Small intestine length                         |
| SSC10:<br>65,833,767-<br>66,229,891  | 0.17(13) | <i>ENSSSCG000000044272, ENSSSCG000000042764, ENSSSCG000000042579,<br/>       ENSSSCG000000041200, ENSSSCG000000043435, ENSSSCG000000041177,<br/>       ENSSSCG000000047695, ENSSSCG000000043797, ENSSSCG000000047071</i> | Corpus luteum number                           |
| SSC16:<br>69,967,228-<br>70,251,797  | 0.17(10) | <i>ENSSSCG000000019555</i>                                                                                                                                                                                               | .                                              |
| SSC10:<br>8,509,342-<br>8,735,370    | 0.17(12) | <i>ENSSSCG000000047944, ENSSSCG000000044167, ENSSSCG000000043065,<br/>       ENSSSCG000000046752, ENSSSCG000000038539, ENSSSCG000000041804,<br/>       ENSSSCG000000049292, ENSSSCG000000044961</i>                      | pH 24 hours <i>post-mortem</i> (ham)           |

|                                       |          |                                                                                                                                                                                                                                                                                                                                                                                                                                                                                                                                                                                                                                                                                                                                                                                              |                                                                                                                              |
|---------------------------------------|----------|----------------------------------------------------------------------------------------------------------------------------------------------------------------------------------------------------------------------------------------------------------------------------------------------------------------------------------------------------------------------------------------------------------------------------------------------------------------------------------------------------------------------------------------------------------------------------------------------------------------------------------------------------------------------------------------------------------------------------------------------------------------------------------------------|------------------------------------------------------------------------------------------------------------------------------|
| SSC1:<br>107,075,251-<br>108,648,750  | 0.17(13) | <i>ENSSSCG00000004545 (ANKDD1A), ENSSSCG000000037998,<br/> ENSSSCG000000044010, ENSSSCG00000004547, ENSSSCG00000004548<br/> (PIF1), ENSSSCG00000004549 (RBPMS2), ENSSSCG00000004550<br/> (OAZ2), ENSSSCG00000004551 (ZNF609), ENSSSCG000000041571,<br/> ENSSSCG00000004552 (TRIP4), ENSSSCG00000004554,<br/> ENSSSCG000000045500, ENSSSCG00000004558 (CSNK1G1),<br/> ENSSSCG000000034137 (PPIB), ENSSSCG000000037275 (SNX22),<br/> ENSSSCG000000042703, ENSSSCG000000048062, ENSSSCG000000047502,<br/> ENSSSCG000000034124 (CIAO2A), ENSSSCG000000021588 (DAPK2),<br/> ENSSSCG00000004561 (HERC1), ENSSSCG000000043545,<br/> ENSSSCG000000038786, ENSSSCG000000028737 (USP3),<br/> ENSSSCG000000040895, ENSSSCG000000047861, ENSSSCG000000032949<br/> (APH1B), ENSSSCG00000004565 (CA12)</i> | Litter size, corpus luteum number,<br>HDL/LDL ratio, drip loss                                                               |
| SSC13:<br>117,757,022-<br>118,601,930 | 0.17(10) | <i>ENSSSCG000000011765 (USP13), ENSSSCG000000011766 (PEX5L),<br/> ENSSSCG000000046936, ENSSSCG000000042124</i>                                                                                                                                                                                                                                                                                                                                                                                                                                                                                                                                                                                                                                                                               | .                                                                                                                            |
| SSC6:<br>151,680,316-<br>152,263,991  | 0.17(12) | <i>ENSSSCG000000050509, ENSSSCG000000046052, ENSSSCG000000042411,<br/> ENSSSCG00000003823 (C1orf87)</i>                                                                                                                                                                                                                                                                                                                                                                                                                                                                                                                                                                                                                                                                                      | .                                                                                                                            |
| SSC4:<br>113,883,126-<br>114,151,582  | 0.16(11) | .                                                                                                                                                                                                                                                                                                                                                                                                                                                                                                                                                                                                                                                                                                                                                                                            | Skin thickness                                                                                                               |
| SSC1:<br>93,695,736-<br>96,303,394    | 0.16(11) | <i>ENSSSCG00000008882, ENSSSCG000000040747, ENSSSCG000000044547,<br/> ENSSSCG000000041974, ENSSSCG00000004490 (SETBP1),<br/> ENSSSCG000000045948, ENSSSCG000000050379, ENSSSCG000000051783,<br/> ENSSSCG000000050905, ENSSSCG000000051009, ENSSSCG00000004491<br/> (SLC14A2), ENSSSCG00000004492 (SLC14A1), ENSSSCG00000004493<br/> (SIGLEC15), ENSSSCG000000021072 (EPG5), ENSSSCG00000004499,<br/> ENSSSCG00000004498, ENSSSCG00000004500 (C18orf25),<br/> ENSSSCG000000041792, ENSSSCG000000051447, ENSSSCG00000004502<br/> (RNF165), ENSSSCG00000004503 (LOXHD1), ENSSSCG000000050304,<br/> ENSSSCG000000032053 (ST8SLA5)</i>                                                                                                                                                            | Feed conversion ratio, age at puberty,<br>removal parity, mean corpuscular<br>hemoglobin content, mean<br>corpuscular volume |

|                                       |          |                                                                                                                                                                                                                                                                                                                                                                                                                                                                                                        |                                                                  |
|---------------------------------------|----------|--------------------------------------------------------------------------------------------------------------------------------------------------------------------------------------------------------------------------------------------------------------------------------------------------------------------------------------------------------------------------------------------------------------------------------------------------------------------------------------------------------|------------------------------------------------------------------|
| SSC3:<br>14,376,309-<br>14,569,226    | 0.16(10) | ENSSSCG00000007727, ENSSSCG000000018380                                                                                                                                                                                                                                                                                                                                                                                                                                                                | pH 45 minutes <i>post-mortem</i> , 45 min-<br>24-hour pH decline |
| SSC13:<br>32,626,695-<br>32,906,051   | 0.16(11) | ENSSSCG000000011398 (SEMA3F), ENSSSCG000000042718 (GNAT1),<br>ENSSSCG000000011397 (SLC38A3), ENSSSCG000000011399 (GNAI2),<br>ENSSSCG000000011400 (SEMA3B), ENSSSCG000000011401 (LSMEM2),<br>ENSSSCG000000011402 (IFRD2), ENSSSCG000000041673,<br>ENSSSCG000000024363 (HYAL3), ENSSSCG000000011404,<br>ENSSSCG000000011405 (HYAL2), ENSSSCG000000011407 (RASSF1),<br>ENSSSCG000000011408 (ZMYND10), ENSSSCG000000011410<br>(CYB561D2), ENSSSCG000000043195 (TMEM115),<br>ENSSSCG000000011412 (CACNA2D2) | .                                                                |
| SSC1:<br>1,994,718-<br>2,627,242      | 0.16(13) | ENSSSCG000000032403, ENSSSCG000000037137, ENSSSCG000000024562<br>(CCR6), ENSSSCG000000034196, ENSSSCG00000004023 (FGFR1OP),<br>ENSSSCG000000043814, ENSSSCG00000004024, ENSSSCG000000048164,<br>ENSSSCG000000043922, ENSSSCG00000004022 (RPS6KA2),<br>ENSSSCG000000048885, ENSSSCG000000032916, ENSSSCG00000004020,<br>ENSSSCG000000051382, ENSSSCG000000049363                                                                                                                                        | .                                                                |
| SSC16:<br>438,022-<br>842,912         | 0.16(13) | ENSSSCG000000016780 (CTNND2), ENSSSCG000000018664                                                                                                                                                                                                                                                                                                                                                                                                                                                      | Coping behavior                                                  |
| SSC14:<br>141,967,057-<br>142,089,249 | 0.16(10) | .                                                                                                                                                                                                                                                                                                                                                                                                                                                                                                      | .                                                                |
| SSC1:<br>25,927,201-<br>26,506,878    | 0.16(10) | ENSSSCG000000004149 (NHSL1), ENSSSCG000000020384,<br>ENSSSCG000000004150, ENSSSCG000000048346 (SMIM28),<br>ENSSSCG000000037315, ENSSSCG00000004151, ENSSSCG000000022968<br>(ARFGEF3), ENSSSCG000000046952, ENSSSCG000000045653,<br>ENSSSCG000000042538, ENSSSCG000000038420, ENSSSCG00000004154<br>(TNFAIP3)                                                                                                                                                                                           | Dressing percentage                                              |
| SSC1:<br>251,551,053-<br>252,189,140  | 0.16(10) | ENSSSCG000000005455 (SVEP1), ENSSSCG000000050248,<br>ENSSSCG000000005456 (MUSK), ENSSSCG000000005457 (LPAR1),<br>ENSSSCG000000044924                                                                                                                                                                                                                                                                                                                                                                   | .                                                                |

|                                      |          |                                                                                                                                                                                                                                                                                                                                                                                                                                    |                                                                                                                                                 |
|--------------------------------------|----------|------------------------------------------------------------------------------------------------------------------------------------------------------------------------------------------------------------------------------------------------------------------------------------------------------------------------------------------------------------------------------------------------------------------------------------|-------------------------------------------------------------------------------------------------------------------------------------------------|
| SSC2:<br>139,196,714-<br>139,571,078 | 0.16(11) | <i>ENSSSCG00000032423 (SPOCK1)</i>                                                                                                                                                                                                                                                                                                                                                                                                 | Intramuscular fat content                                                                                                                       |
| SSC18:<br>56,474,257-<br>57,050,998  | 0.16(10) | .                                                                                                                                                                                                                                                                                                                                                                                                                                  | Testicular width                                                                                                                                |
| SSC2:<br>4,145,839-<br>4,614,073     | 0.16(11) | <i>ENSSSCG00000042011, ENSSSCG00000043204, ENSSSCG00000012878, ENSSSCG00000012879, ENSSSCG00000012880, ENSSSCG00000012882 (TESMIN), ENSSSCG00000012883, ENSSSCG00000012884 (PPP6R3), ENSSSCG00000012885</i>                                                                                                                                                                                                                        | Dressing percentage, shear force at first peak, meat color a*, teat number                                                                      |
| SSC1:<br>27,306,383-<br>27,672,943   | 0.15(11) | <i>ENSSSCG00000004160 (PEX7), ENSSSCG00000020379, ENSSSCG00000050757, ENSSSCG00000026041 (MAP3K5), ENSSSCG00000046709, ENSSSCG00000039049 (MAP7)</i>                                                                                                                                                                                                                                                                               | .                                                                                                                                               |
| SSC15:<br>32,017,591-<br>32,539,459  | 0.15(13) | <i>ENSSSCG00000027105 (TUBGCP5), ENSSSCG00000019095, ENSSSCG00000031951, ENSSSCG00000050316, ENSSSCG00000048648, ENSSSCG00000045888, ENSSSCG00000036898 (NIPA2), ENSSSCG00000040778 (NIPA1), ENSSSCG00000023665 (FBXO25), ENSSSCG00000044544, ENSSSCG00000039562 (TDRP), ENSSSCG00000028195</i>                                                                                                                                    | Monocyte percentage, tibia length                                                                                                               |
| SSC3:<br>16,403,039-<br>16,652,462   | 0.15(10) | <i>ENSSSCG00000007737 (TPST1), ENSSSCG00000018775, ENSSSCG00000032119 (CRCP), ENSSSCG00000019976, ENSSSCG00000007738, ENSSSCG00000047936</i>                                                                                                                                                                                                                                                                                       | 45 min-24-hour pH decline, pH 24 hours <i>post-mortem</i> (ham)                                                                                 |
| SSC2:<br>12,082,068-<br>12,605,988   | 0.15(18) | <i>ENSSSCG00000045087, ENSSSCG00000036715, ENSSSCG00000040765, ENSSSCG00000037942, ENSSSCG00000031303, ENSSSCG00000050458, ENSSSCG00000013144, ENSSSCG00000042706, ENSSSCG00000013145 (DTX4), ENSSSCG00000033703 (FAM111A), ENSSSCG00000013147 (FAM111B), ENSSSCG00000013148 (GLYATL2), ENSSSCG00000040088, ENSSSCG00000042844, ENSSSCG00000013151, ENSSSCG00000013155, ENSSSCG00000021176 (LPXN), ENSSSCG00000013157 (OR5B21)</i> | Obesity index, biceps brachii weight, feed conversion ratio, average daily gain, average backfat thickness, mean corpuscular hemoglobin content |
| SSC15:<br>22,584,606-<br>23,011,779  | 0.15(12) | <i>ENSSSCG00000046326, ENSSSCG00000041988, ENSSSCG00000046908</i>                                                                                                                                                                                                                                                                                                                                                                  | .                                                                                                                                               |

|                                       |          |                                                                                                                                                                                                                                                                                                                                  |                                                                  |
|---------------------------------------|----------|----------------------------------------------------------------------------------------------------------------------------------------------------------------------------------------------------------------------------------------------------------------------------------------------------------------------------------|------------------------------------------------------------------|
| SSC15:<br>137,159,347-<br>137,449,752 | 0.15(13) | <i>ENSSSCG00000032849 (MLPH), ENSSSCG00000036981 (PRLH),<br/>ENSSSCG00000016328 (RAB17), ENSSSCG00000050312,<br/>ENSSSCG00000016330 (LRRFIP1), ENSSSCG00000016332 (RBM44)</i>                                                                                                                                                    | White blood cell number, feed intake<br>per feeding, head weight |
| SSC11:<br>67,401,150-<br>67,859,534   | 0.15(12) | <i>ENSSSCG00000026863 (FARP1), ENSSSCG00000009511 (STK24),<br/>ENSSSCG00000009513, ENSSSCG00000022112 (DOCK9),<br/>ENSSSCG00000033940</i>                                                                                                                                                                                        | Lean meat percentage                                             |
| SSC13:<br>106,130,701-<br>107,338,079 | 0.15(10) | <i>ENSSSCG00000023393 (ZBBX), ENSSSCG00000044118,<br/>ENSSSCG00000050873, ENSSSCG00000045530, ENSSSCG00000011737<br/>(SERPINI2), ENSSSCG00000011738 (WDR49), ENSSSCG00000011739<br/>(PDCD10), ENSSSCG00000011740 (SERPINI1), ENSSSCG00000045704,<br/>ENSSSCG00000040950, ENSSSCG00000044612, ENSSSCG00000011741<br/>(GOLIM4)</i> | .                                                                |
| SSC16:<br>34,938,863-<br>35,212,148   | 0.15(10) | <i>ENSSSCG00000016913 (DDX4), ENSSSCG00000016915 (IL31RA),<br/>ENSSSCG00000016916 (IL6ST)</i>                                                                                                                                                                                                                                    | Feed conversion ratio, Arachidic acid<br>to stearic acid ratio   |
| SSC9:<br>44,822,332-<br>45,073,381    | 0.15(10) | <i>ENSSSCG00000015082 (DSCAML1)</i>                                                                                                                                                                                                                                                                                              | .                                                                |
| SSC5:<br>81,555,186-<br>82,123,688    | 0.15(11) | <i>ENSSSCG00000045039, ENSSSCG00000046391, ENSSSCG00000048211,<br/>ENSSSCG00000042336, ENSSSCG00000000857 (IGF1),<br/>ENSSSCG00000000859 (PARPBP), ENSSSCG00000048040,<br/>ENSSSCG00000000858, ENSSSCG00000018311, ENSSSCG00000000860<br/>(NUP37)</i>                                                                            | Triglyceride level                                               |
| SSC3:<br>132,380,008-<br>132,623,706  | 0.15(10) | <i>ENSSSCG00000033193 (TPO), ENSSSCG00000036880,<br/>ENSSSCG00000042966, ENSSSCG00000047203</i>                                                                                                                                                                                                                                  | .                                                                |
| SSC10:<br>14,795,101-<br>15,127,469   | 0.15(11) | <i>ENSSSCG00000010862 (CDC42BPA), ENSSSCG00000042709,<br/>ENSSSCG00000042375, ENSSSCG00000010863 (AHCTF1)</i>                                                                                                                                                                                                                    | .                                                                |
| SSC3:<br>141,647,496-<br>142,275,000  | 0.15(11) | .                                                                                                                                                                                                                                                                                                                                | .                                                                |

|                                     |          |                                                                                                                                                                                                                                                                                                                                                                                    |                                  |
|-------------------------------------|----------|------------------------------------------------------------------------------------------------------------------------------------------------------------------------------------------------------------------------------------------------------------------------------------------------------------------------------------------------------------------------------------|----------------------------------|
| SSC17:<br>11,112,492-<br>11,436,064 | 0.15(10) | <i>ENSSSCG00000007033 (AP3M2), ENSSSCG00000007032, ENSSSCG00000007030 (IKBKB), ENSSSCG00000007031 (POLB), ENSSSCG00000007029 (DKK4), ENSSSCG00000007026 (VDAC3), ENSSSCG000000050884, ENSSSCG00000007027 (SLC20A2)</i>                                                                                                                                                             | Hematocrit                       |
| SSC2:<br>23,647,170-<br>24,122,841  | 0.14(10) | <i>ENSSSCG000000045070</i>                                                                                                                                                                                                                                                                                                                                                         | .                                |
| SSC13:<br>58,542,282-<br>58,873,140 | 0.14(11) | <i>ENSSSCG000000043264, ENSSSCG000000045742, ENSSSCG000000046940</i>                                                                                                                                                                                                                                                                                                               | .                                |
| SSC5:<br>11,864,200-<br>12,193,129  | 0.14(10) | <i>ENSSSCG00000000152 (RBFOX2), ENSSSCG000000046062, ENSSSCG00000000151, ENSSSCG000000040453 (SYN3), ENSSSCG000000047089, ENSSSCG000000031866 (TIMP3)</i>                                                                                                                                                                                                                          | .                                |
| SSC9:<br>6,393,773-<br>6,721,992    | 0.14(10) | <i>ENSSSCG000000014794 (NUP98), ENSSSCG000000014796 (CHRNA10), ENSSSCG000000038255 (ART1), ENSSSCG000000014799, ENSSSCG000000048448, ENSSSCG000000048507, ENSSSCG000000014800 (RNF121), ENSSSCG000000023796 (IL18BP), ENSSSCG000000014802 (NUMA1), ENSSSCG000000014803, ENSSSCG000000014804 (LAMTOR1), ENSSSCG000000014805, ENSSSCG000000014806 (ANAPC15), ENSSSCG000000050958</i> | Red blood cell count, hematocrit |
| SSC3:<br>95,385,808-<br>96,071,798  | 0.14(10) | <i>ENSSSCG000000043255, ENSSSCG000000008446 (SIX2), ENSSSCG000000039283 (SIX3), ENSSSCG000000041282, ENSSSCG000000008447 (CAMKMT), ENSSSCG000000040635</i>                                                                                                                                                                                                                         | CD3-negative                     |

**Location:** indicates the chromosome number (SSC1 to SSC18), followed by the starting and end position of the genomic window(s) in base pairs; **Var(%)**: the percental variance explained by the most relevant 10-SNP window within the region of interest; **N SNP**: number of SNP marker included in the genomic region identified; **Positional genes**: Ensembl gene stable ID (with official gene symbol when known) mapped to the genomic regions identified; **QTL traits**: indicates which traits have known QTLs mapped within the genomic region of interest, based on QTLs reported in the Pig QTL database (<https://www.animalgenome.org/cgi-bin/QTLdb/SS/index>).
