# Supplementary material
Source: publisher figshare collection journal article supplement (https://frontiersin.figshare.com/ndownloader/files/23547128)
Supplement: Supplementary file 28 [file 23547128]

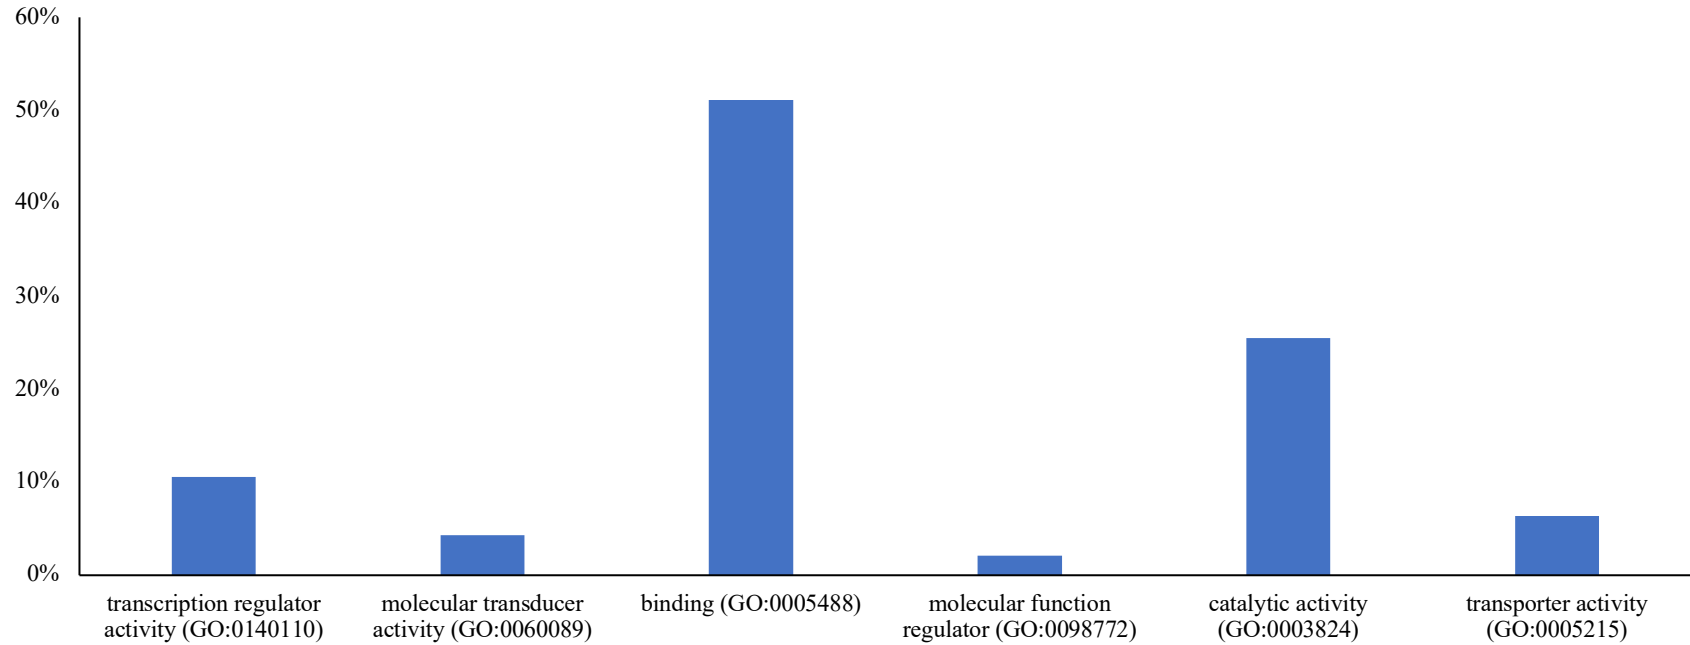

**Figure S6.** Schematic representation of the molecular functions (PANTHER Classification System) and the proportion of candidate genes identified in the genome-wide association analyses for the slope of the genomic reaction norms based on reproductive traits in four maternal-line pig populations.

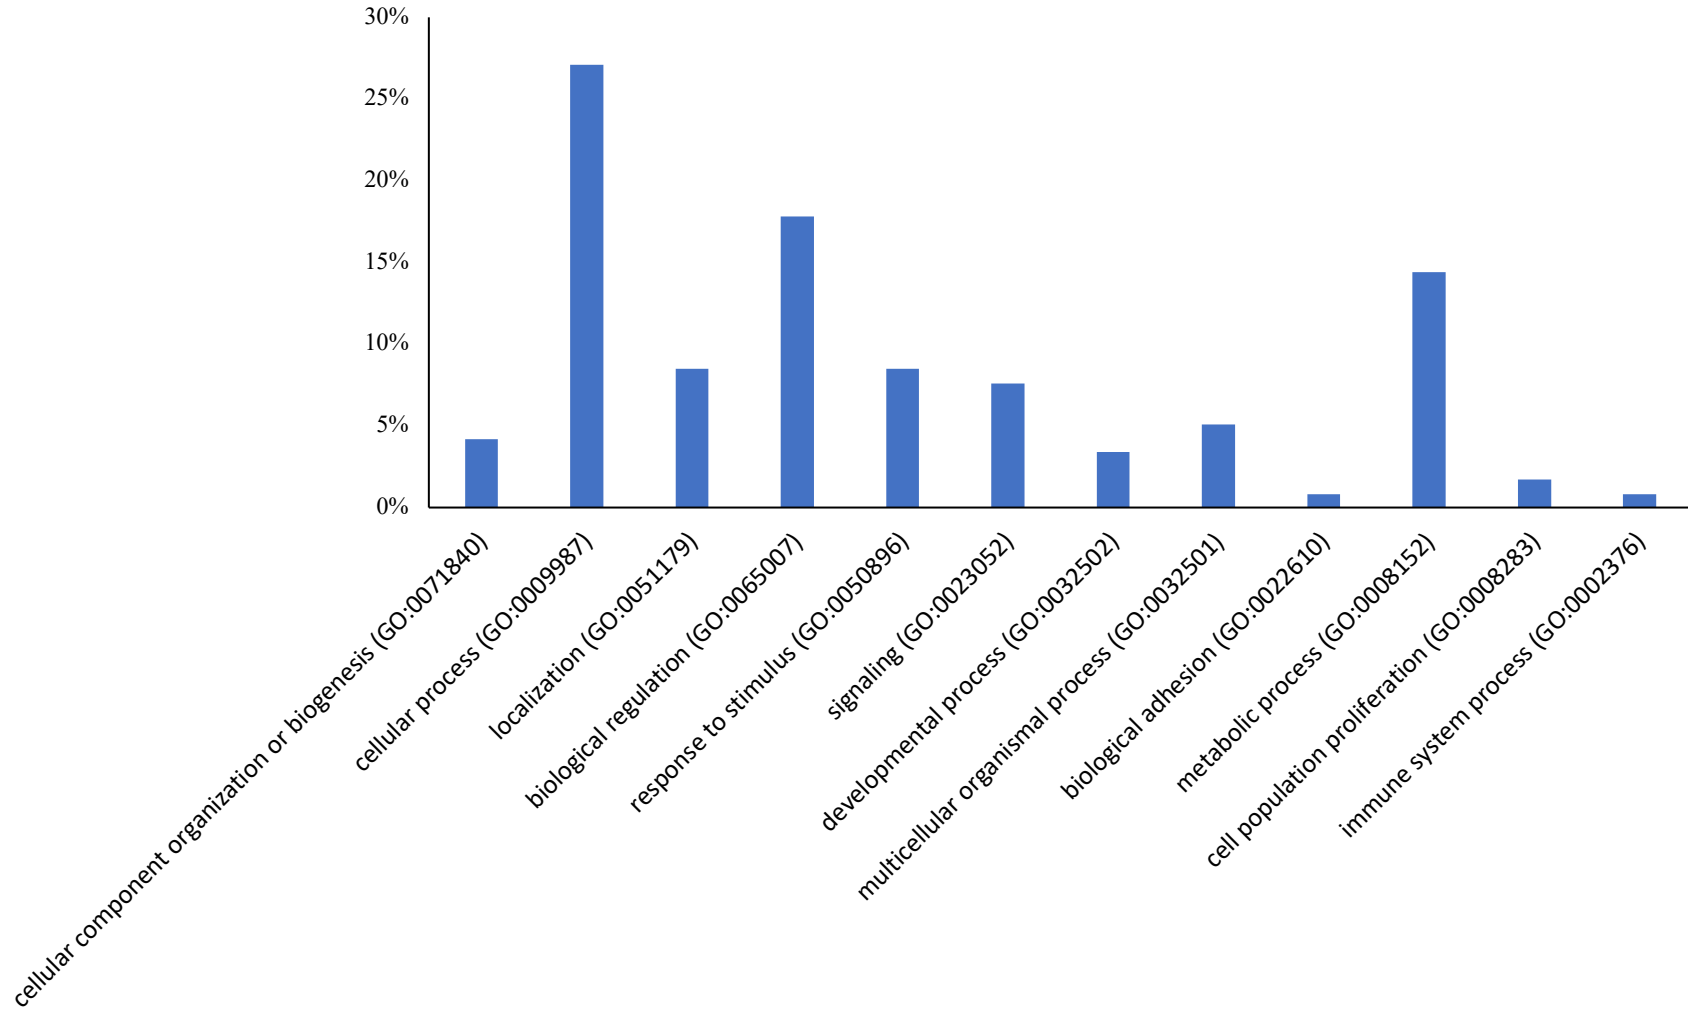

**Figure S7.** Schematic representation of the biological processes (PANTHER Classification System) and the proportion of candidate genes identified in the genome-wide association analyses for the slope of the genomic reaction norms based on reproductive traits in four maternal-line pig populations.

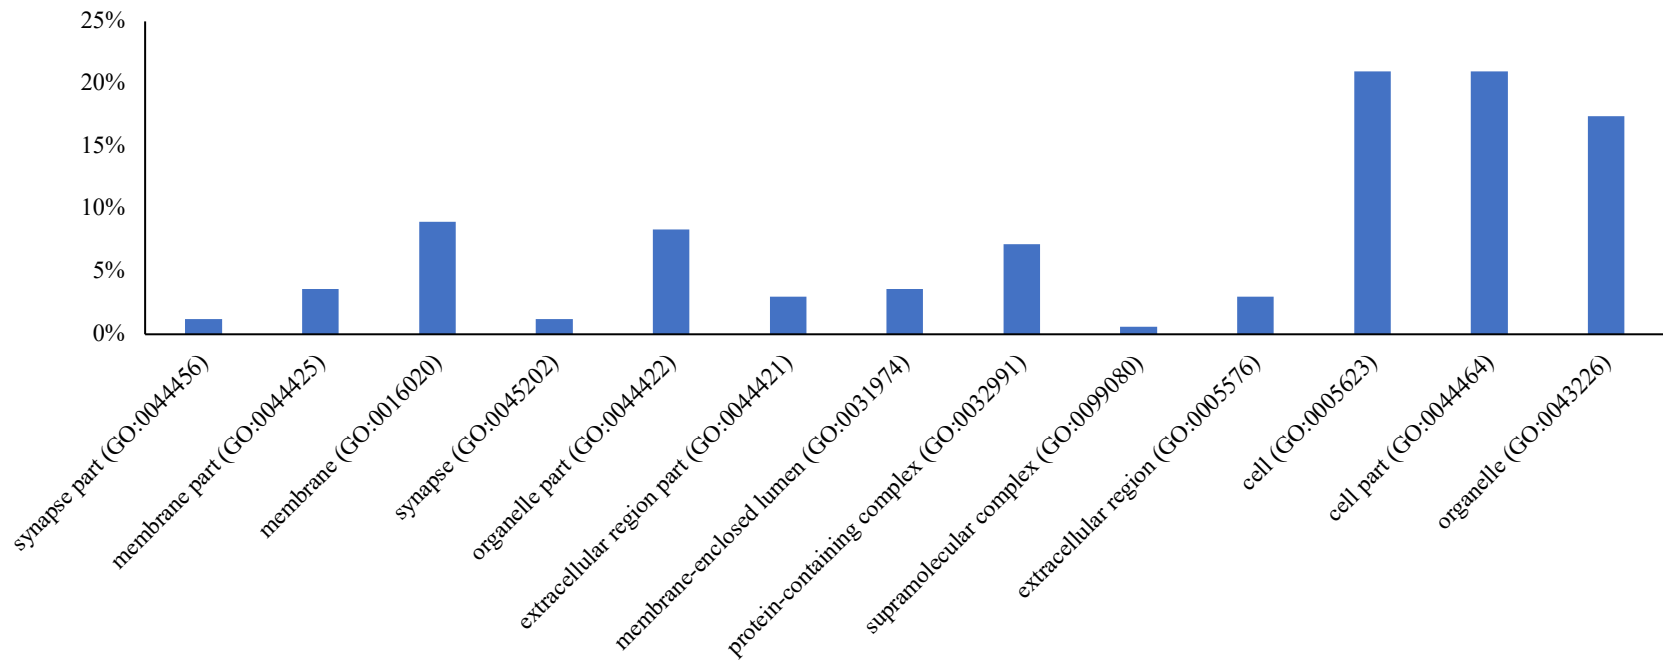

**Figure S8.** Schematic representation of the cellular components (PANTHER Classification System) and the proportion of candidate genes identified in the genome-wide association analyses for the slope of the genomic reaction norms based on reproductive traits in four maternal-line pig populations.
