# Supplementary material
Source: publisher figshare collection journal article supplement (https://frontiersin.figshare.com/ndownloader/files/23547128)

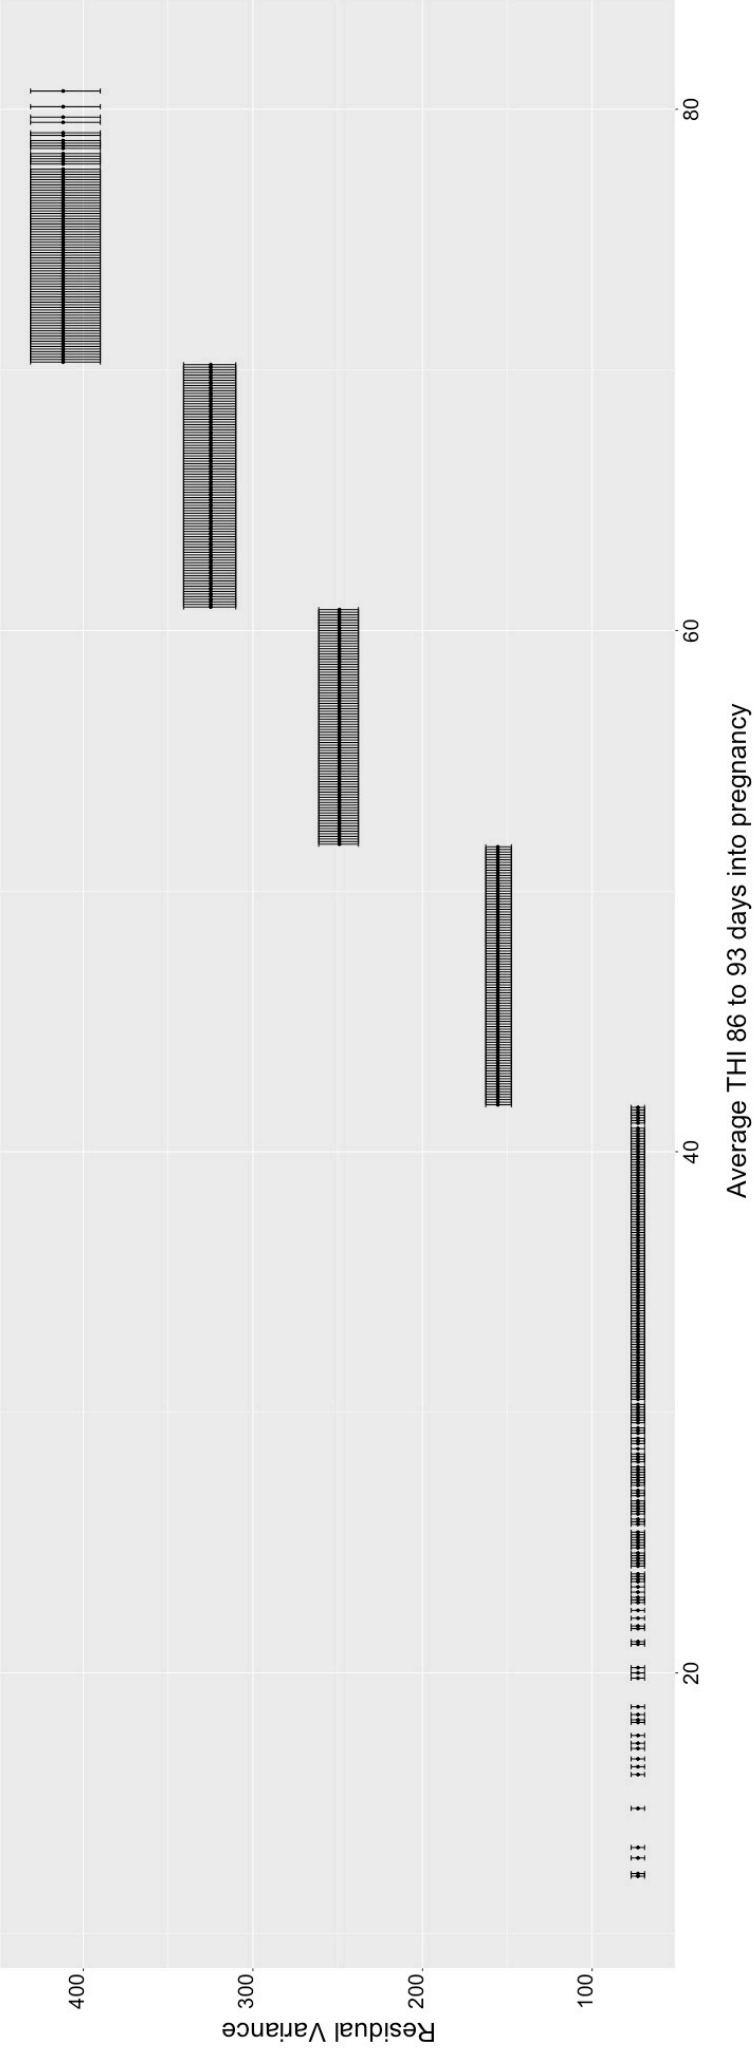

Supplement: Supplementary file 4 [file 23547128]

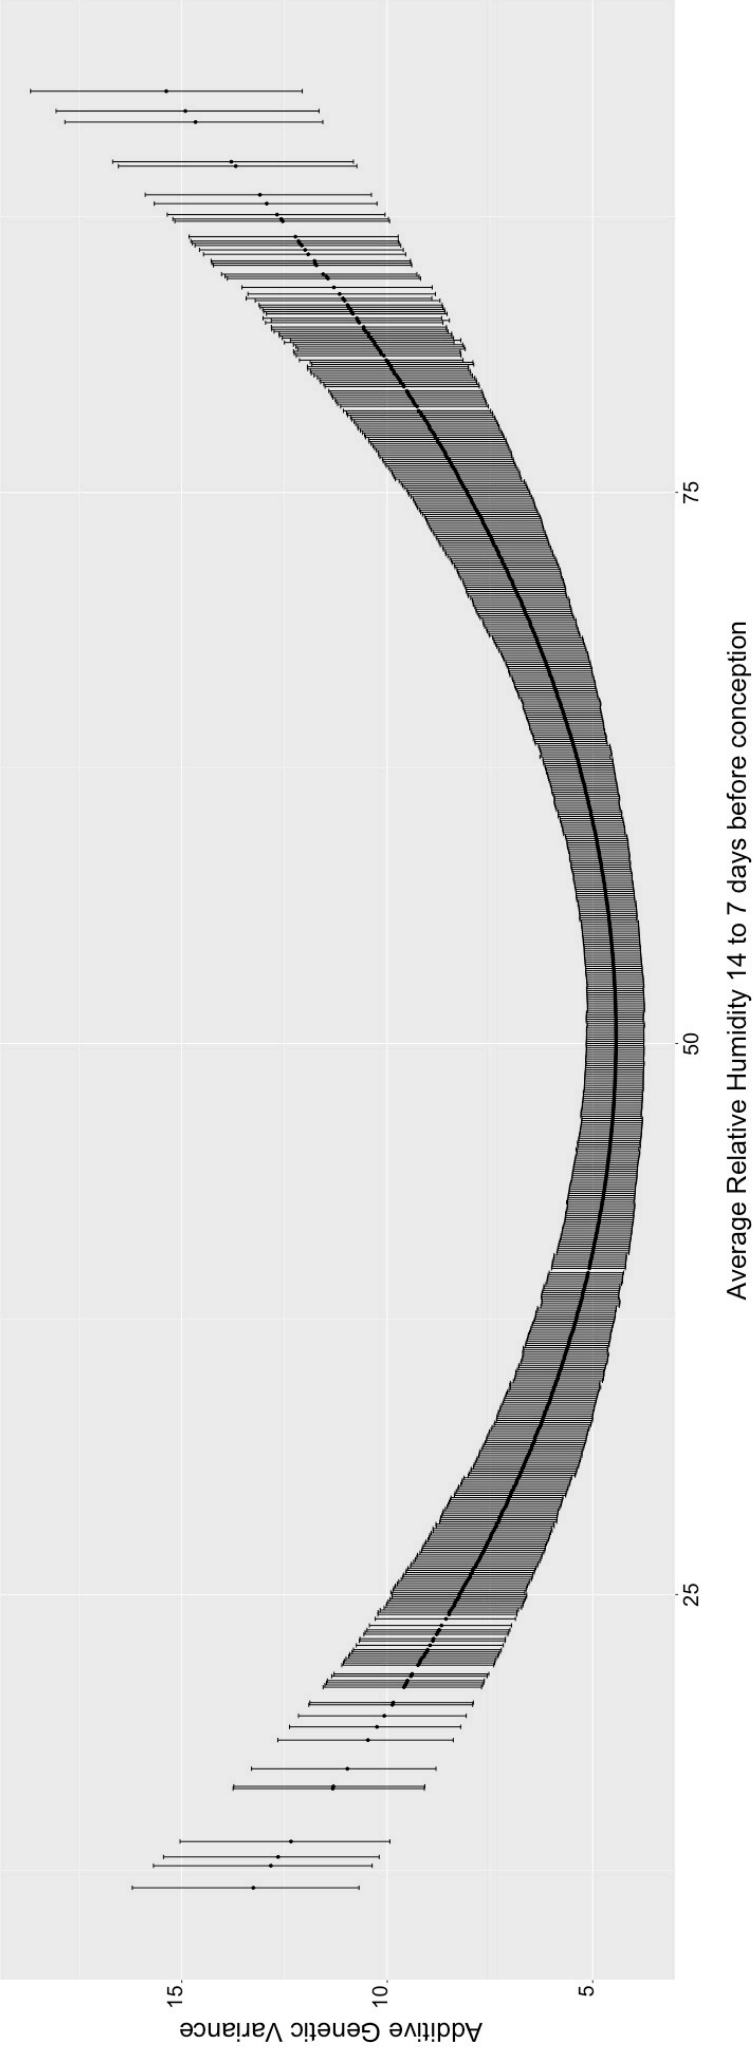

Supplement: Supplementary file 8 [file 23547128]

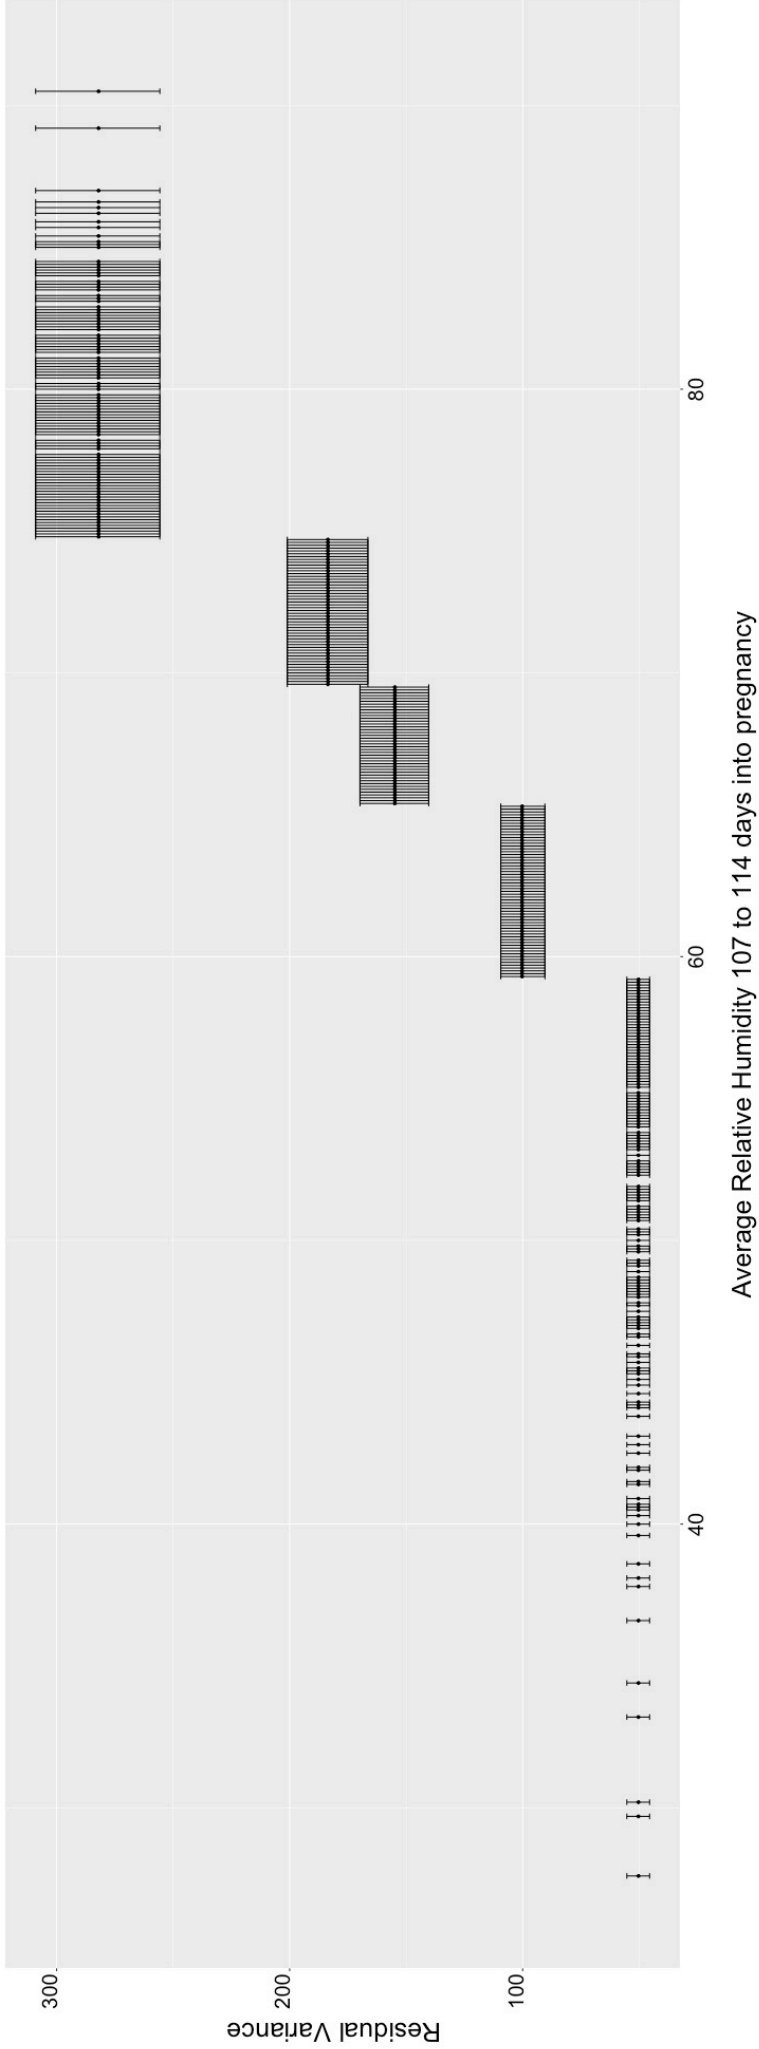

Supplement: Supplementary file 15 [file 23547128]

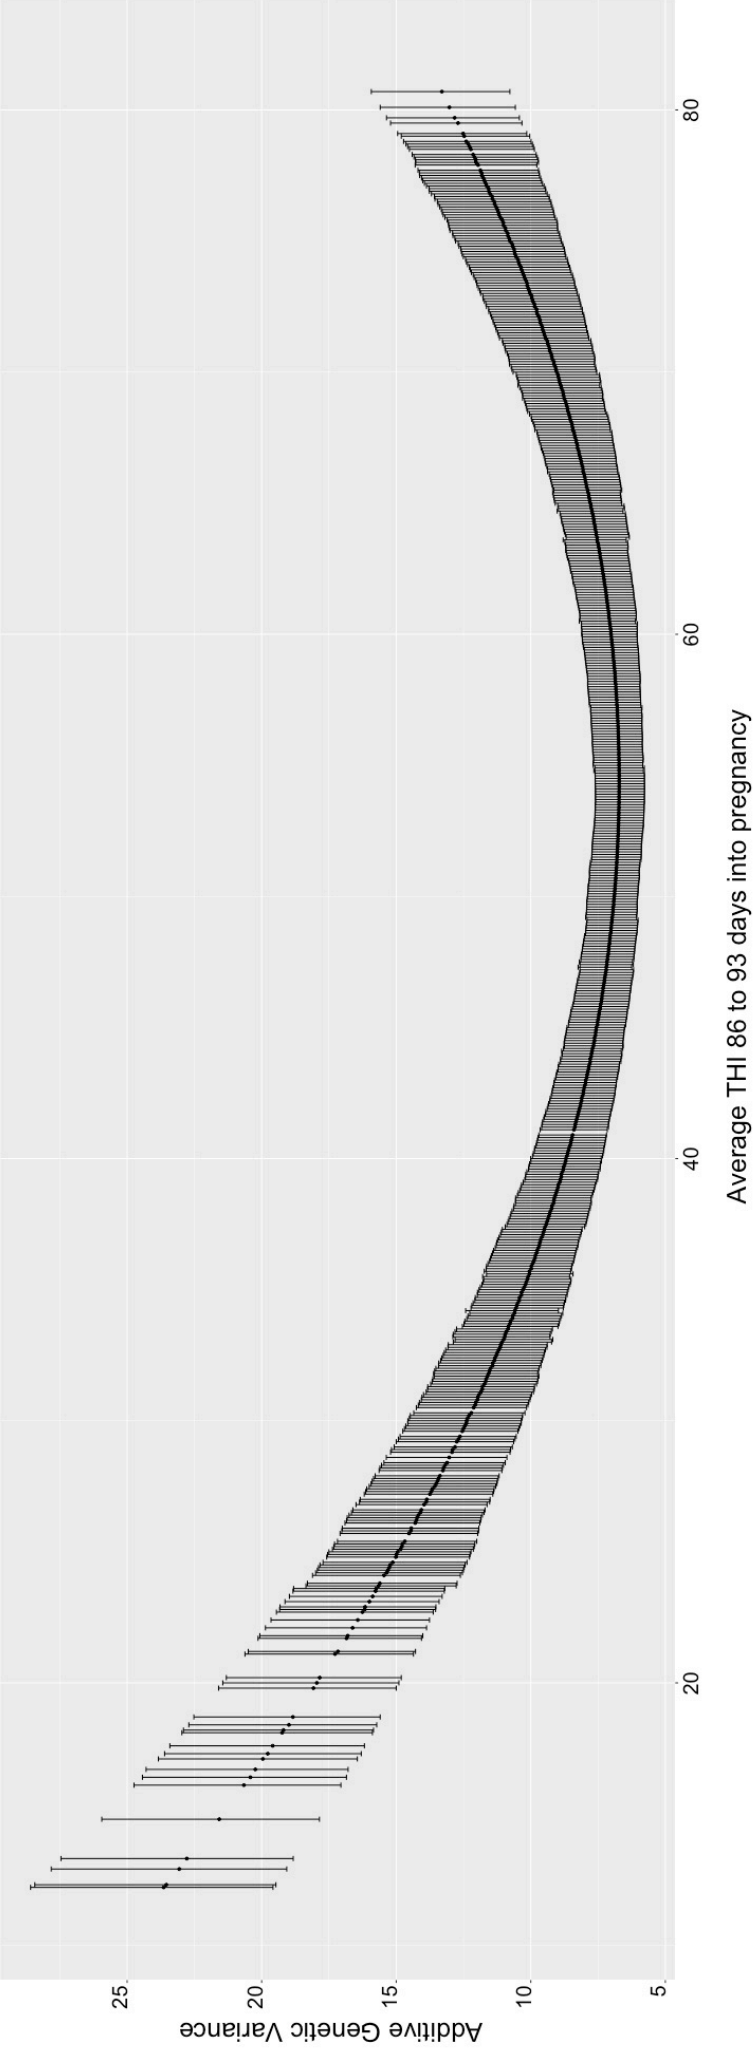

Supplement: Supplementary file 20 [file 23547128]

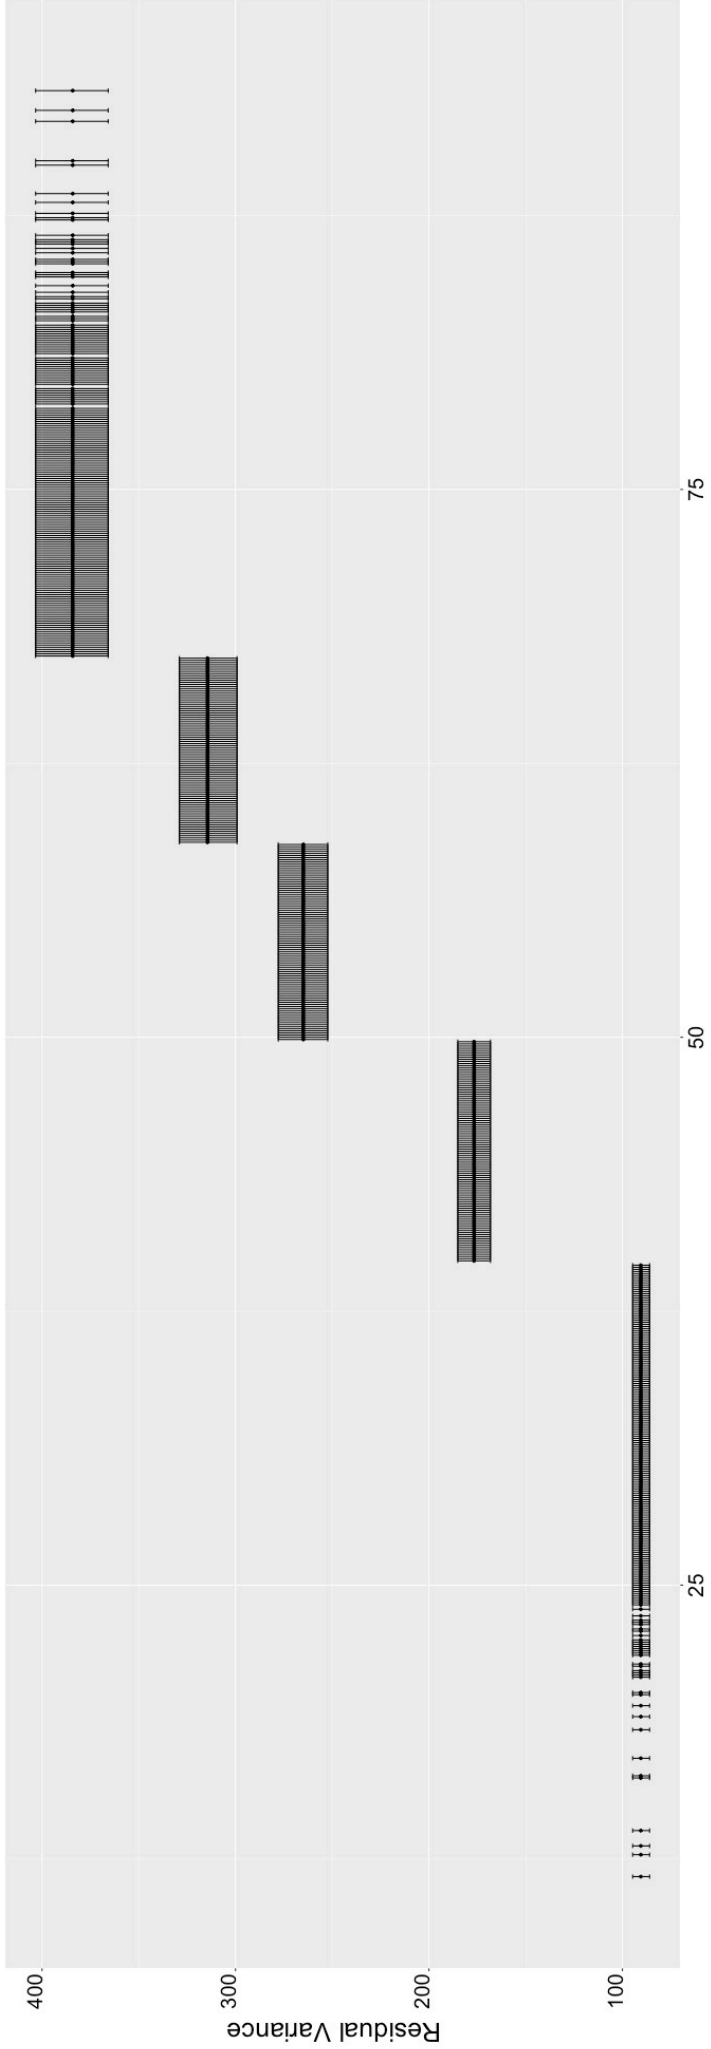

Supplement: Supplementary file 23 [file 23547128]

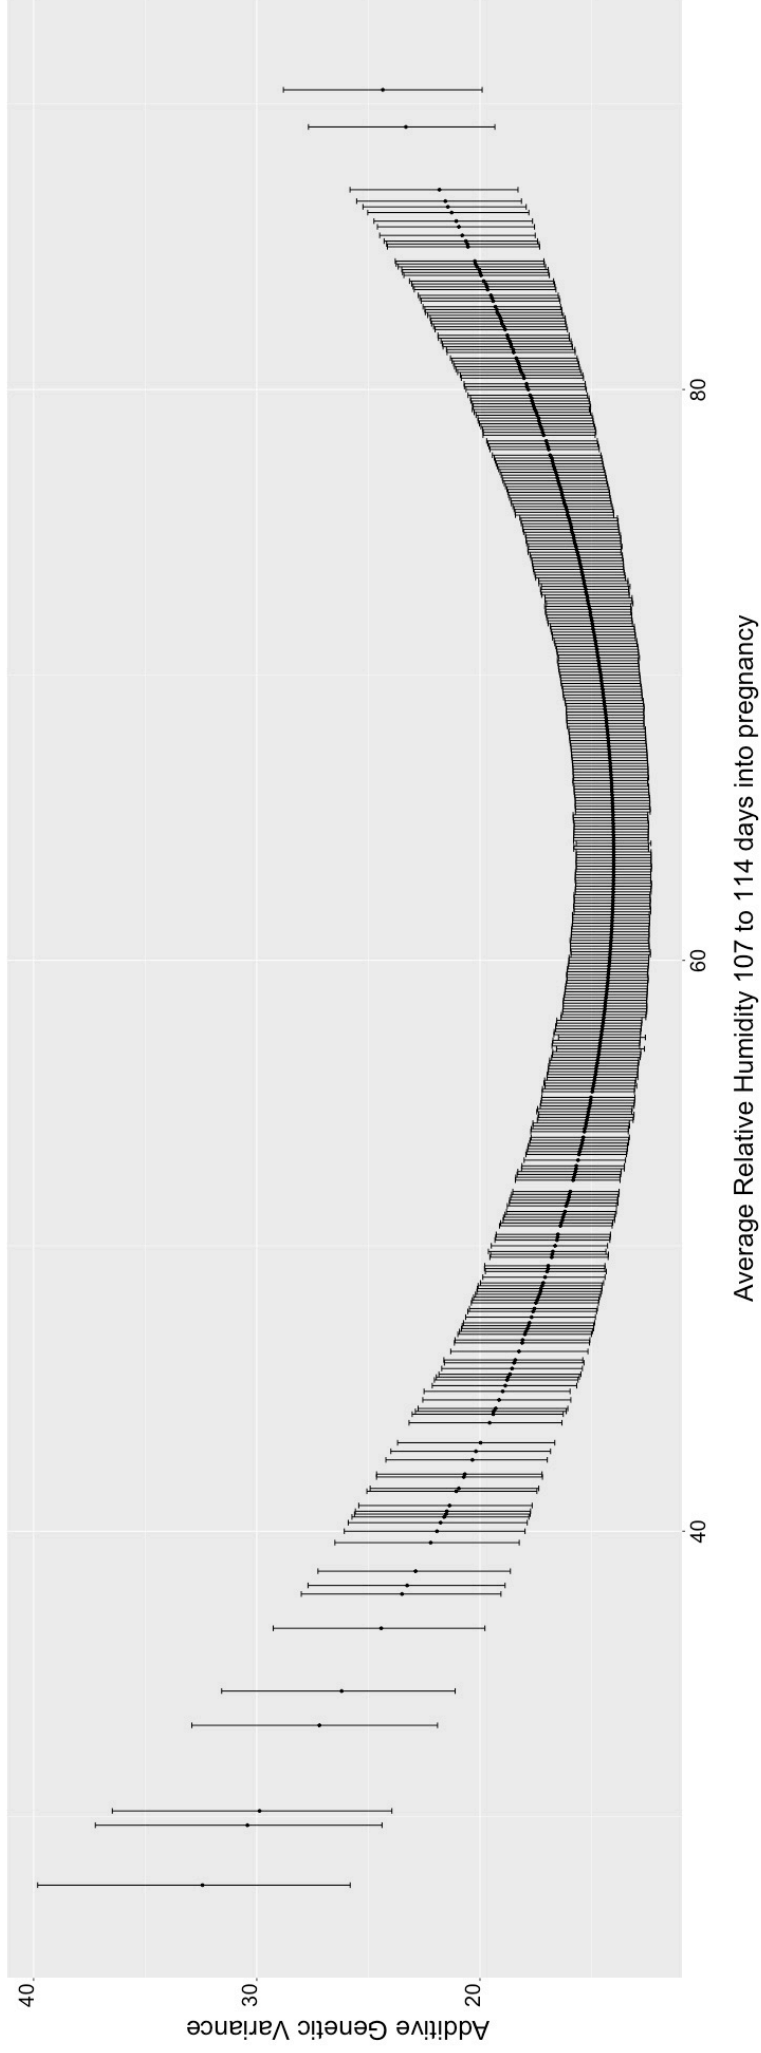

Supplement: Supplementary file 27 [file 23547128]
